# Supplementary material
Source: ML conference proceedings conference paper supplement (https://openreview.net/forum?id=JtSlA972EHP)

CIFAR10 non-convex  $\alpha=0.01$   $q=0.1$

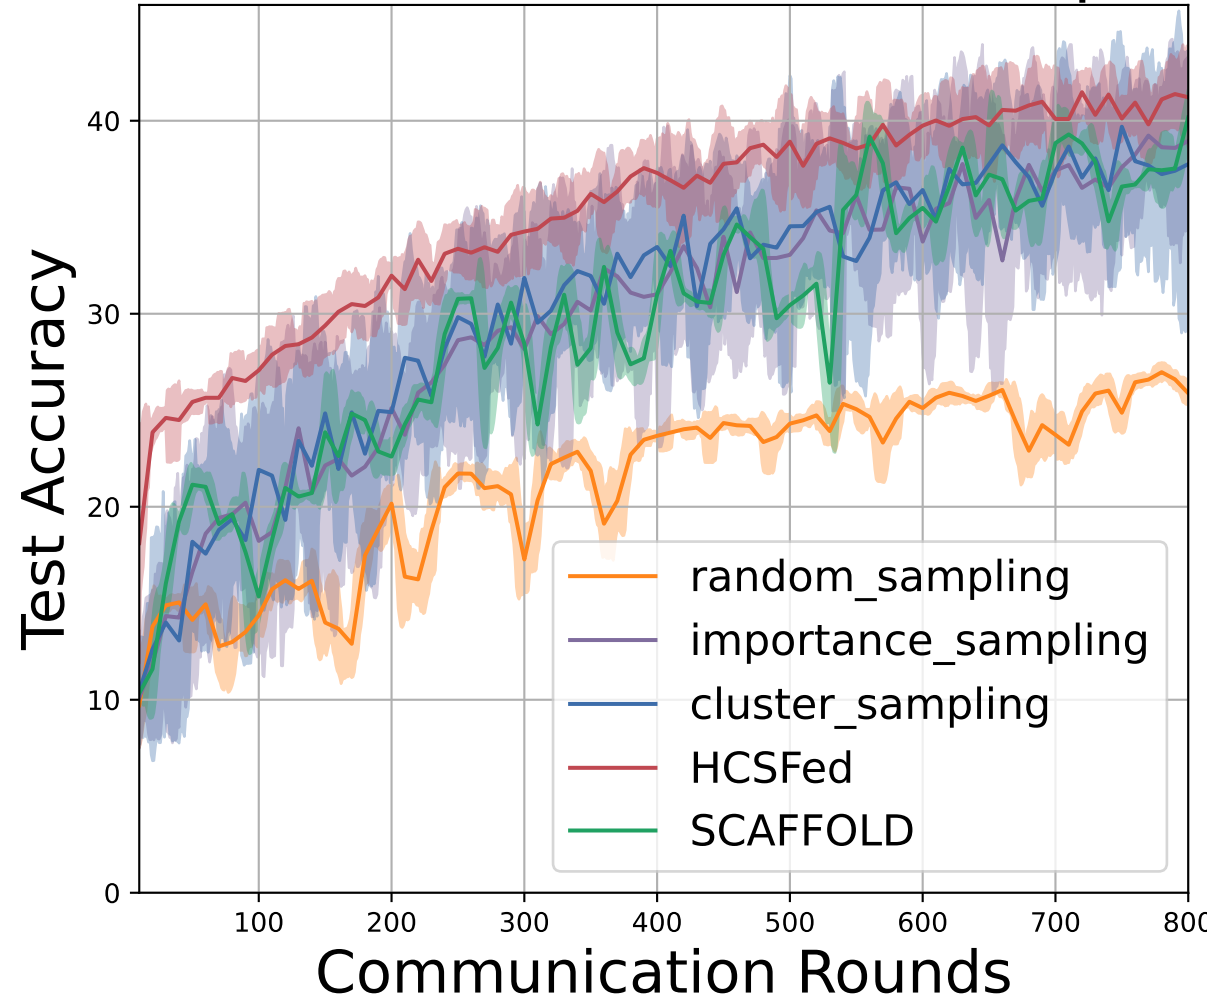

CIFAR10 non-convex  $\alpha=0.01$   $q=0.1$

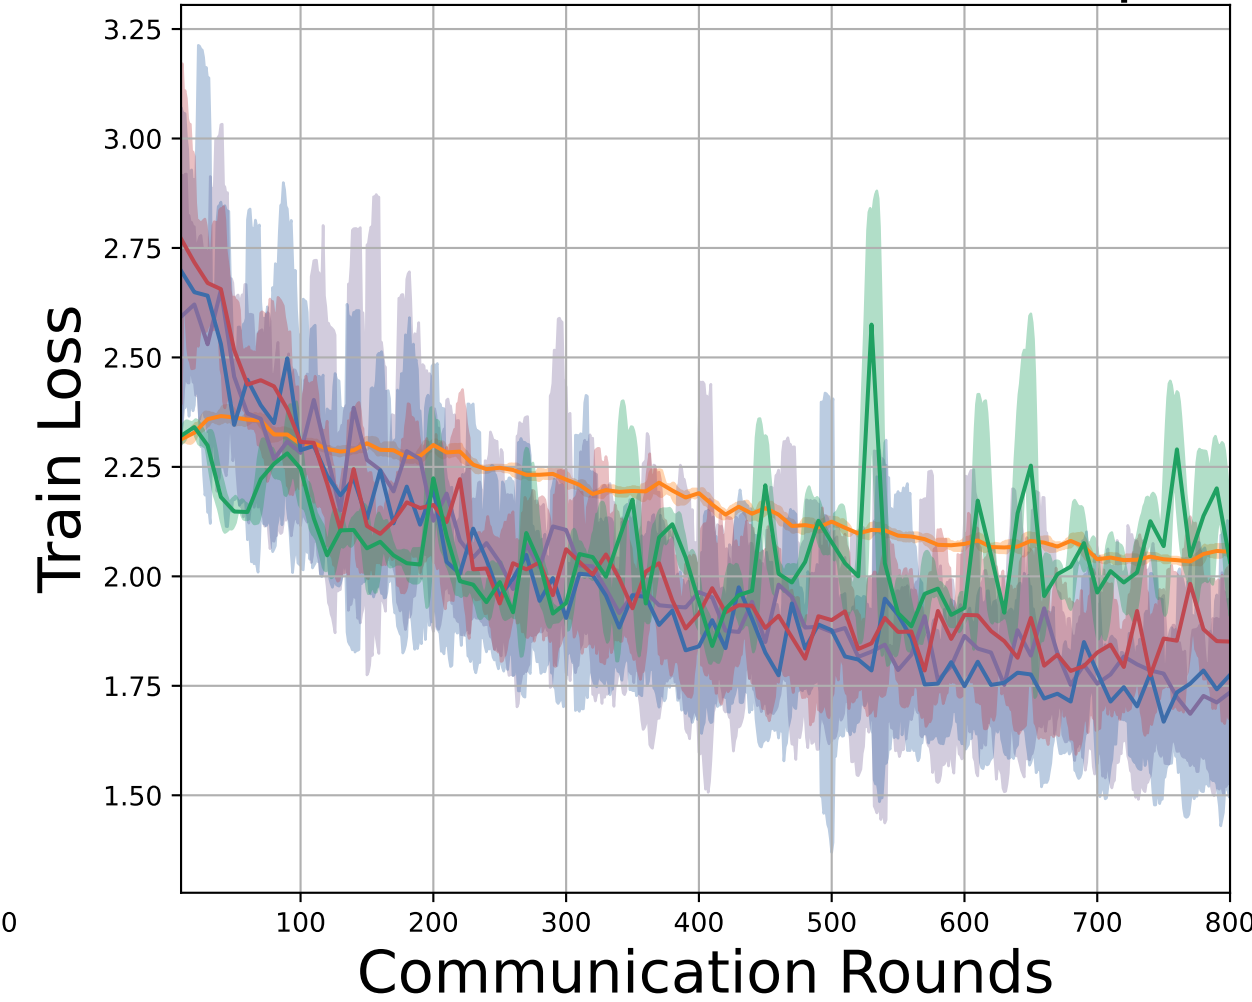

CIFAR10 non-convex  $\alpha=0.01$   $q=0.2$

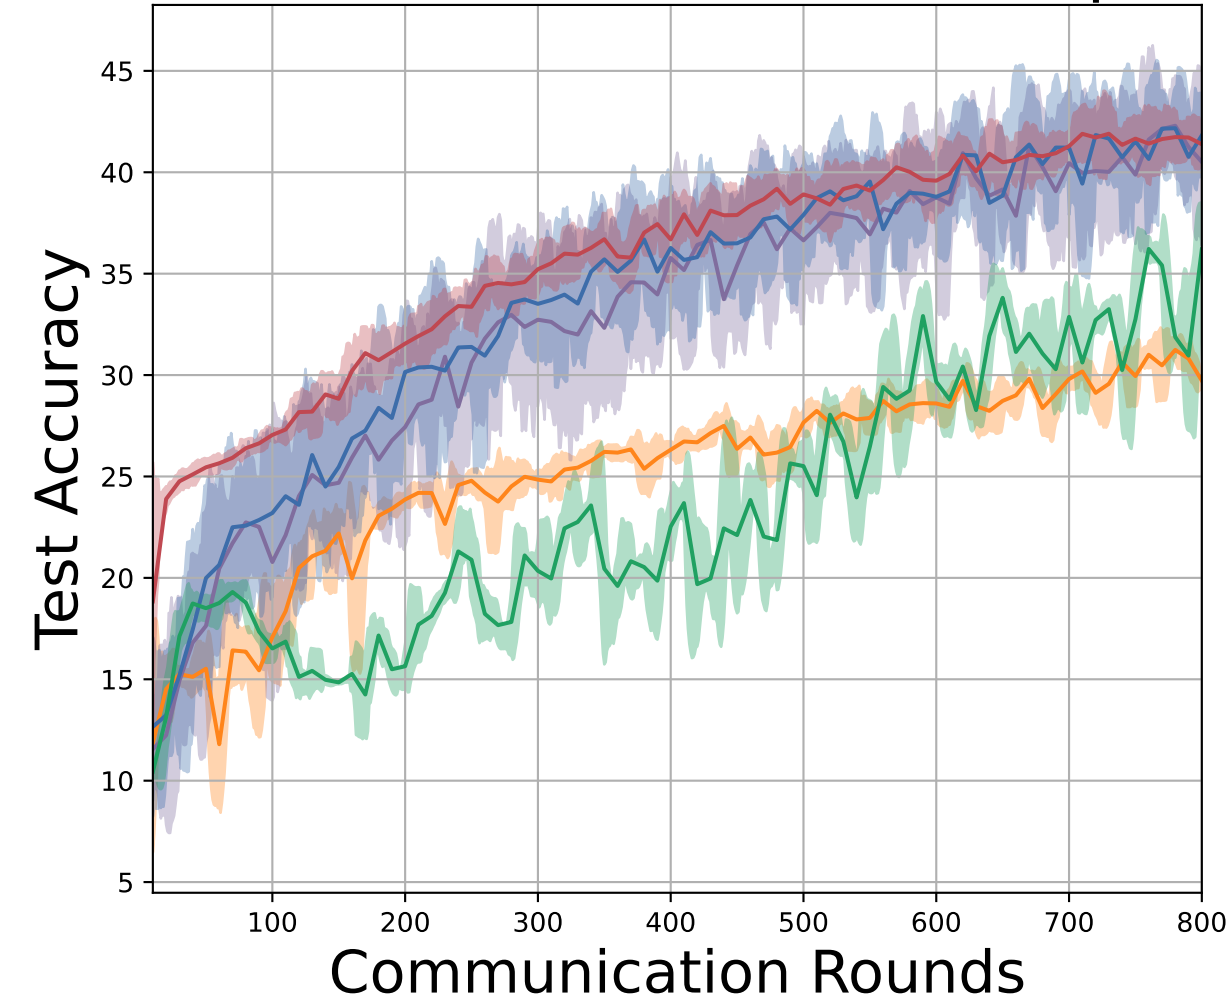

CIFAR10 non-convex  $\alpha=0.01$   $q=0.2$

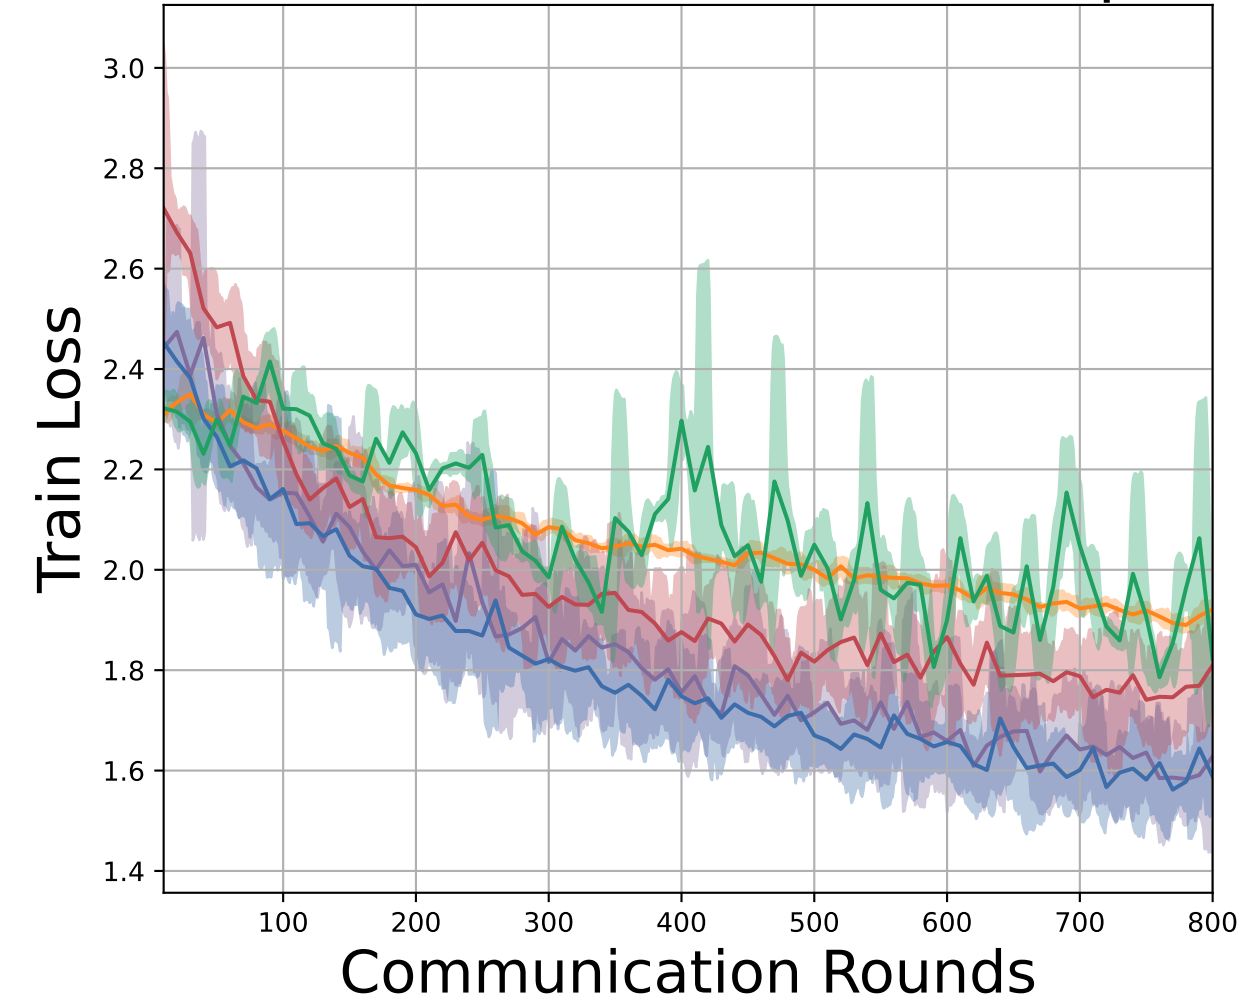

Supplement: supplementary_material [file attachment]
