# Supplementary material
Source: ML conference proceedings conference paper supplement (https://openreview.net/forum?id=JtSlA972EHP)

MNIST IID on FedNova

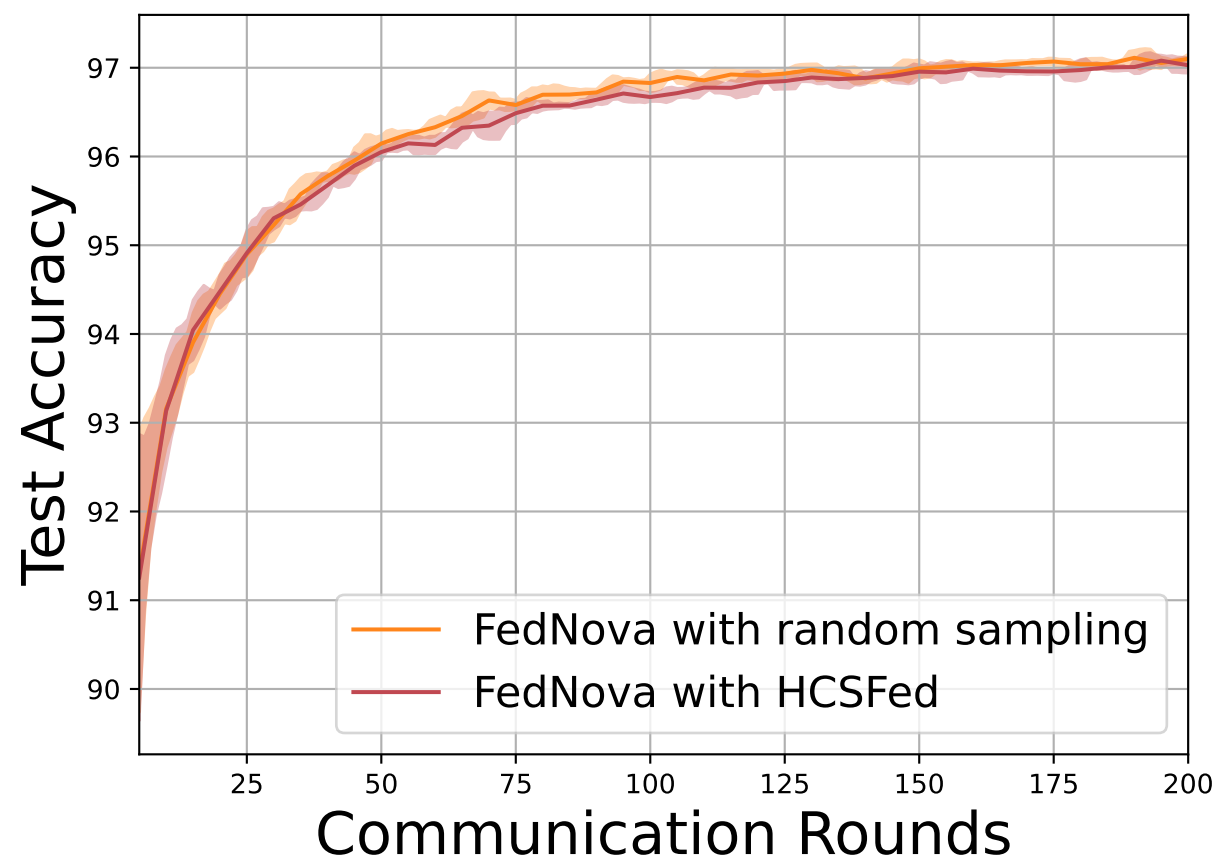

MNIST IID on FedNova

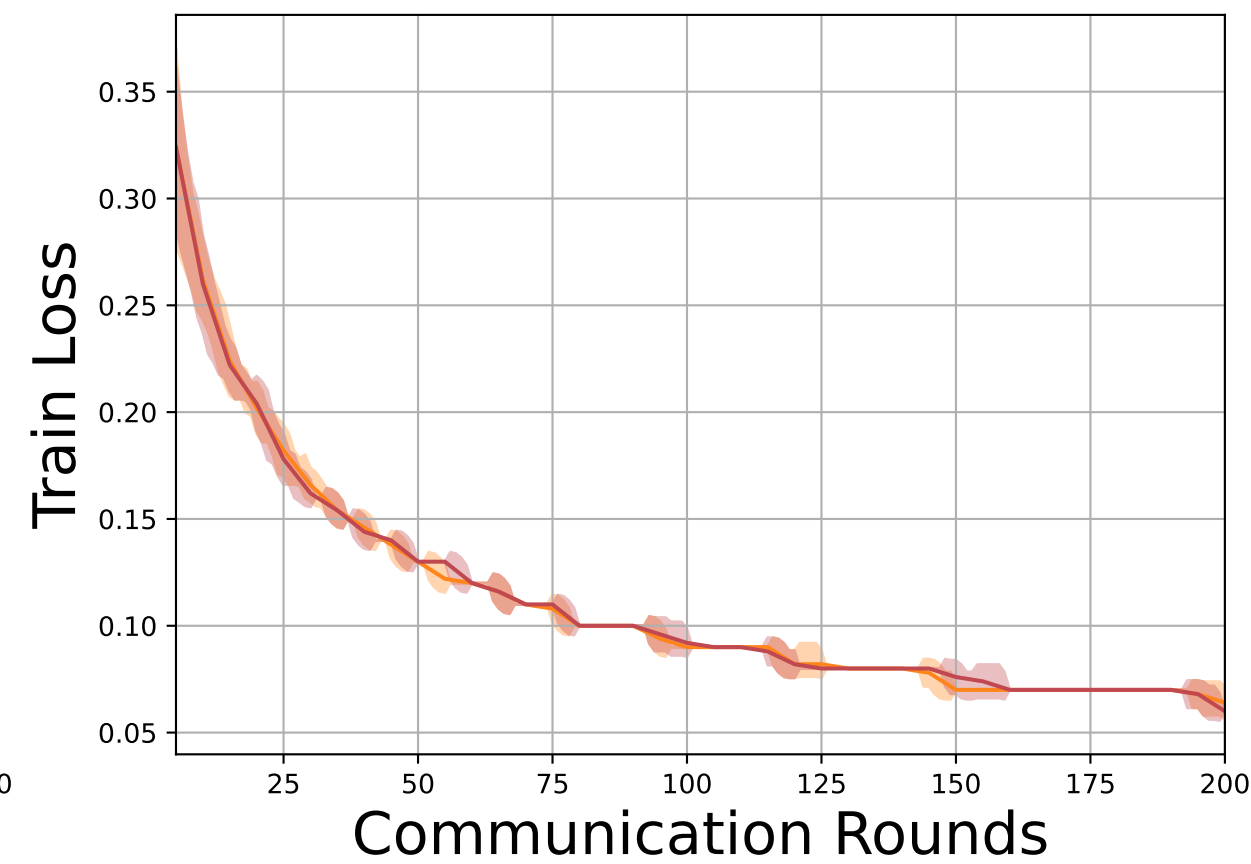

MNIST non-IID on FedNova

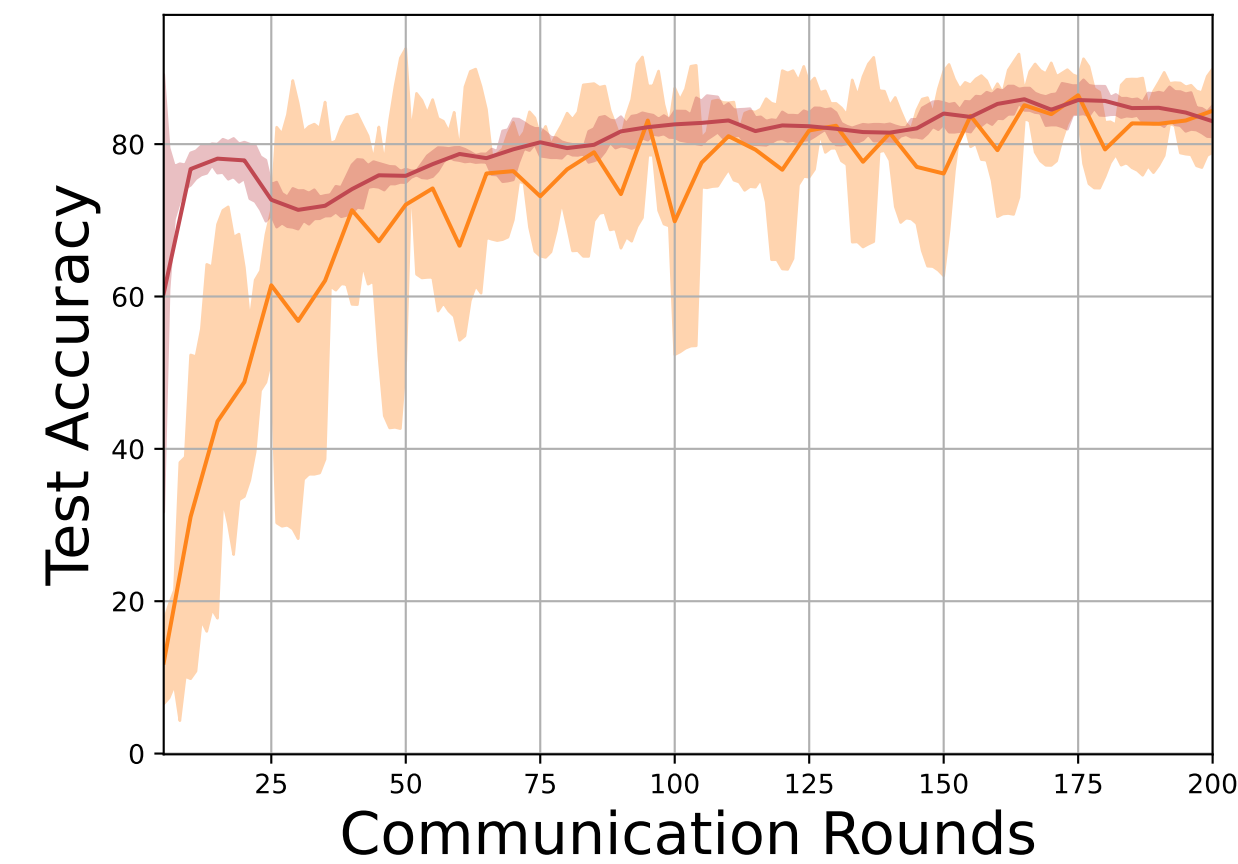

MNIST non-IID on FedNova

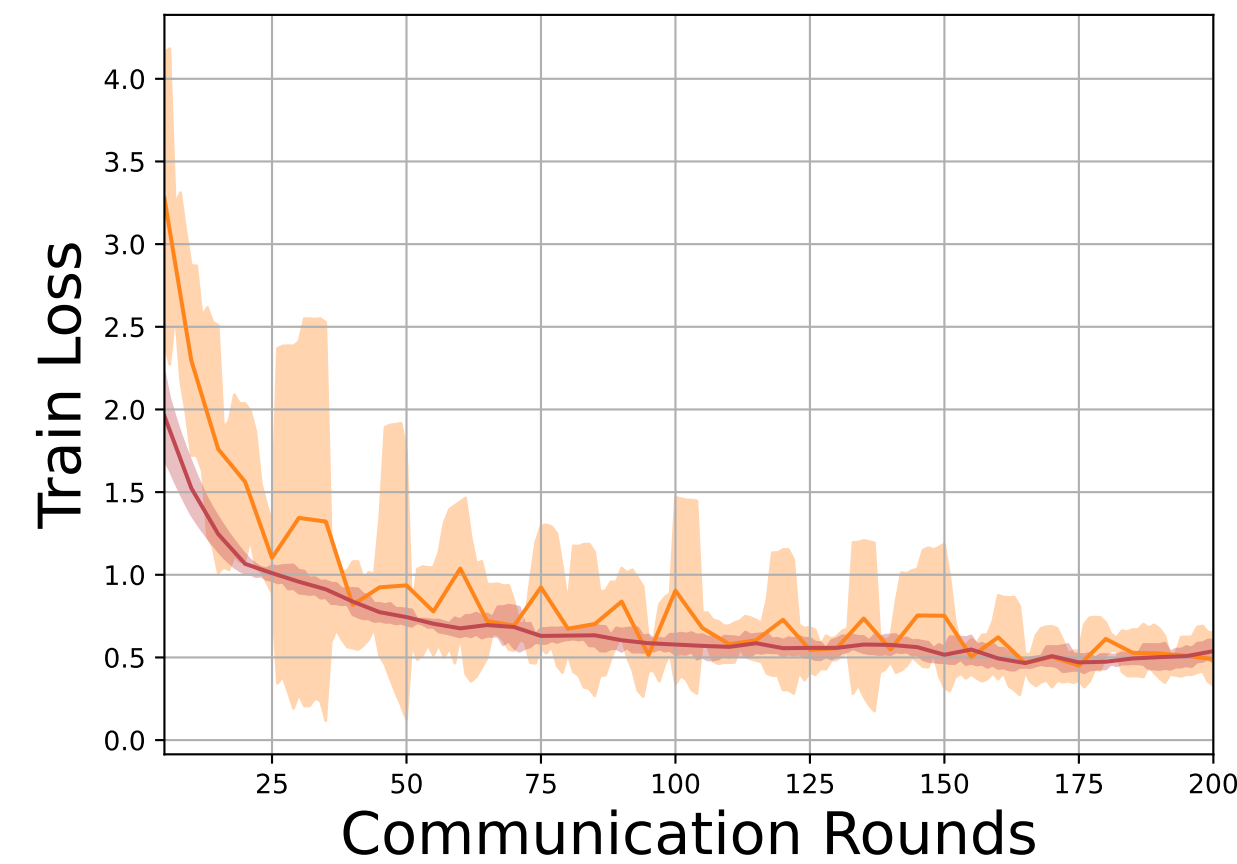

FMNIST IID on FedNova

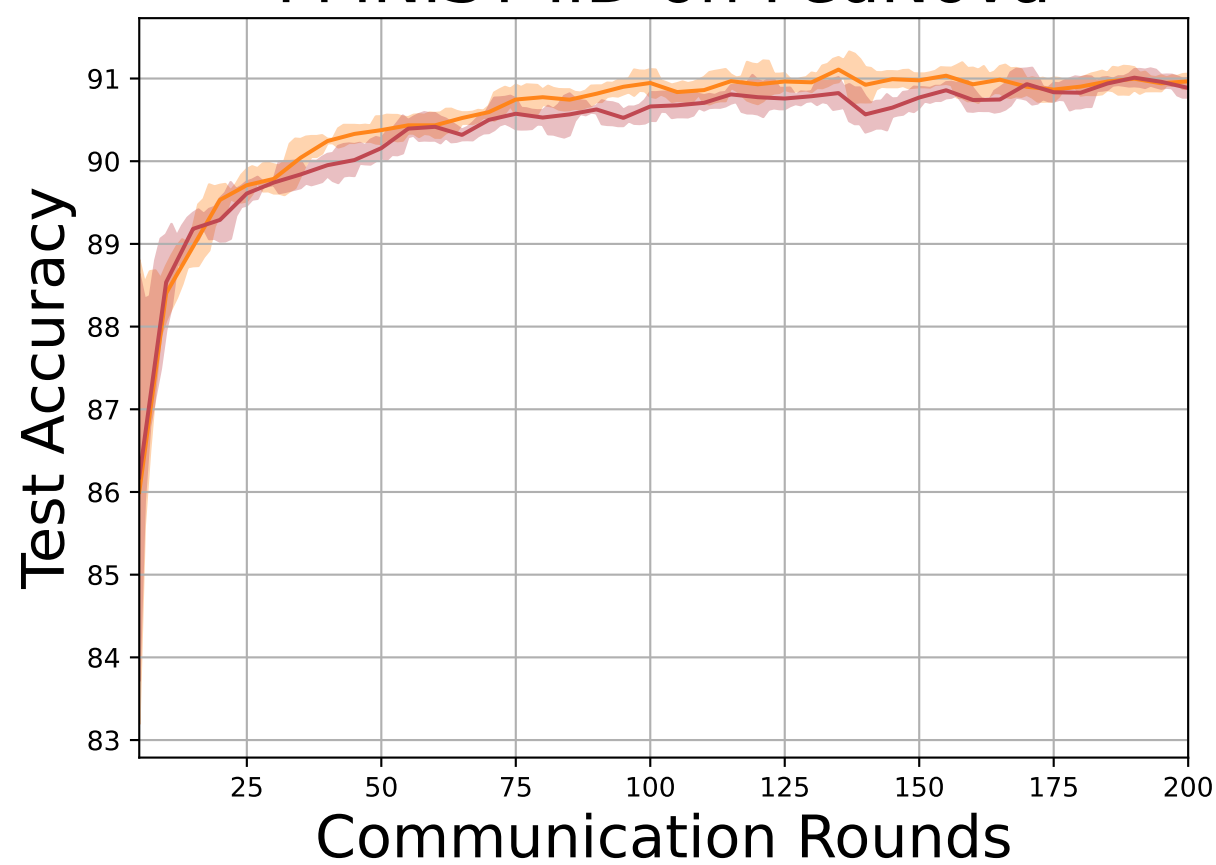

FMNIST IID on FedNova

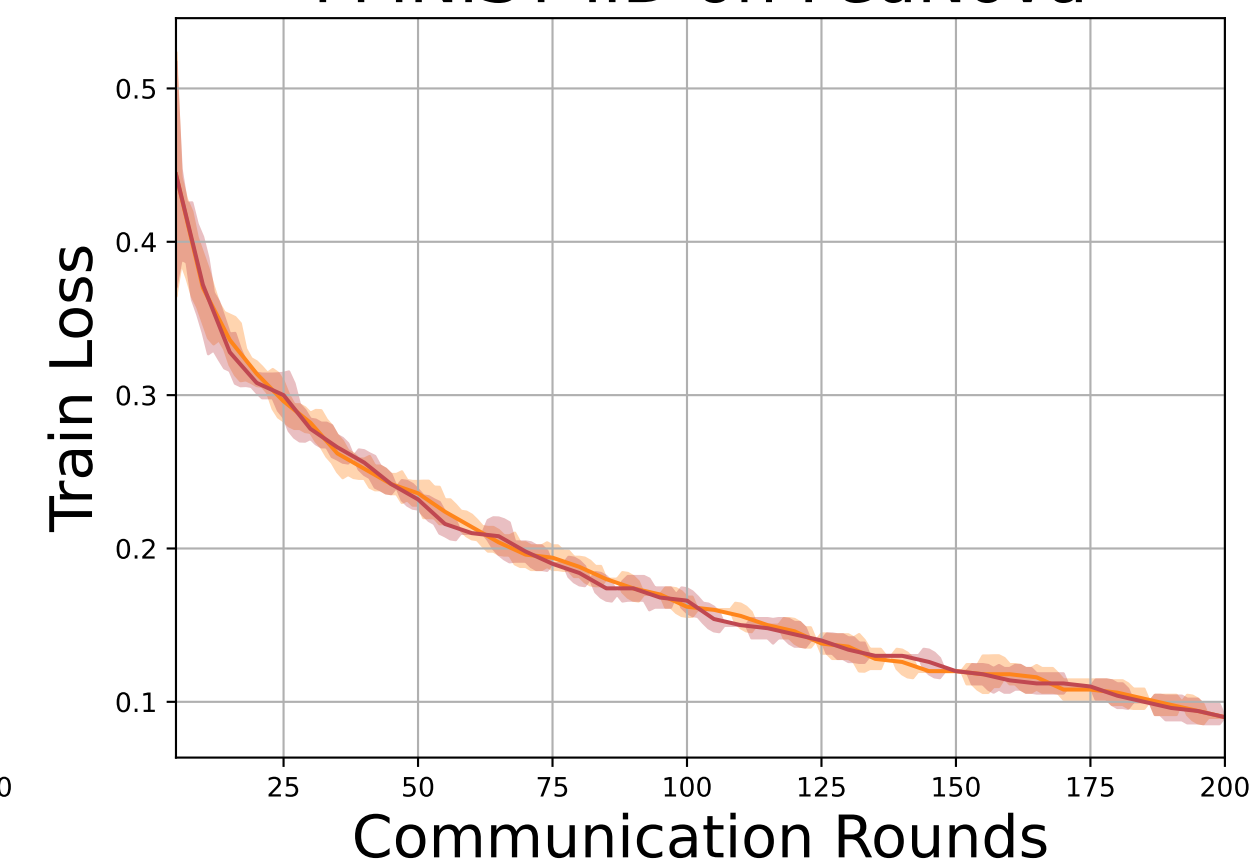

FMNIST non-IID on FedNova

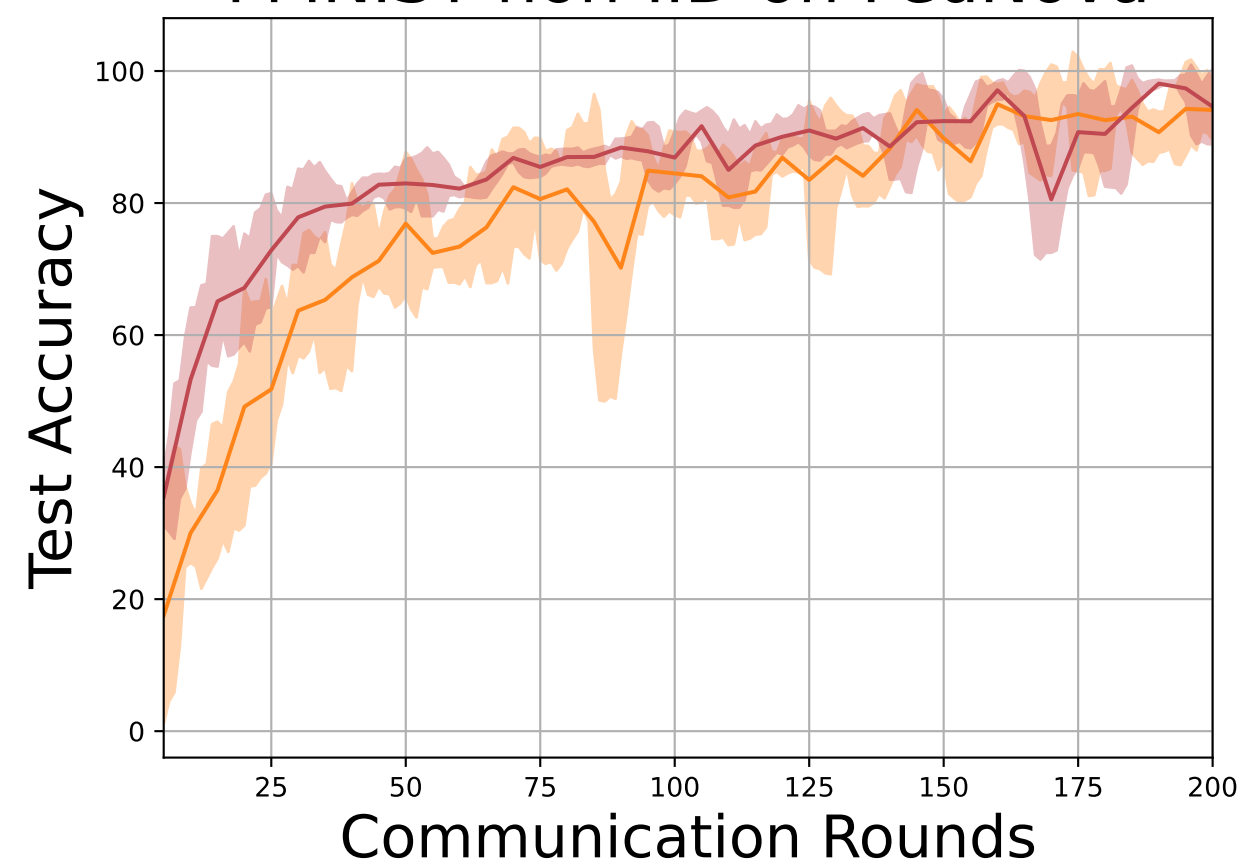

FMNIST non-IID on FedNova

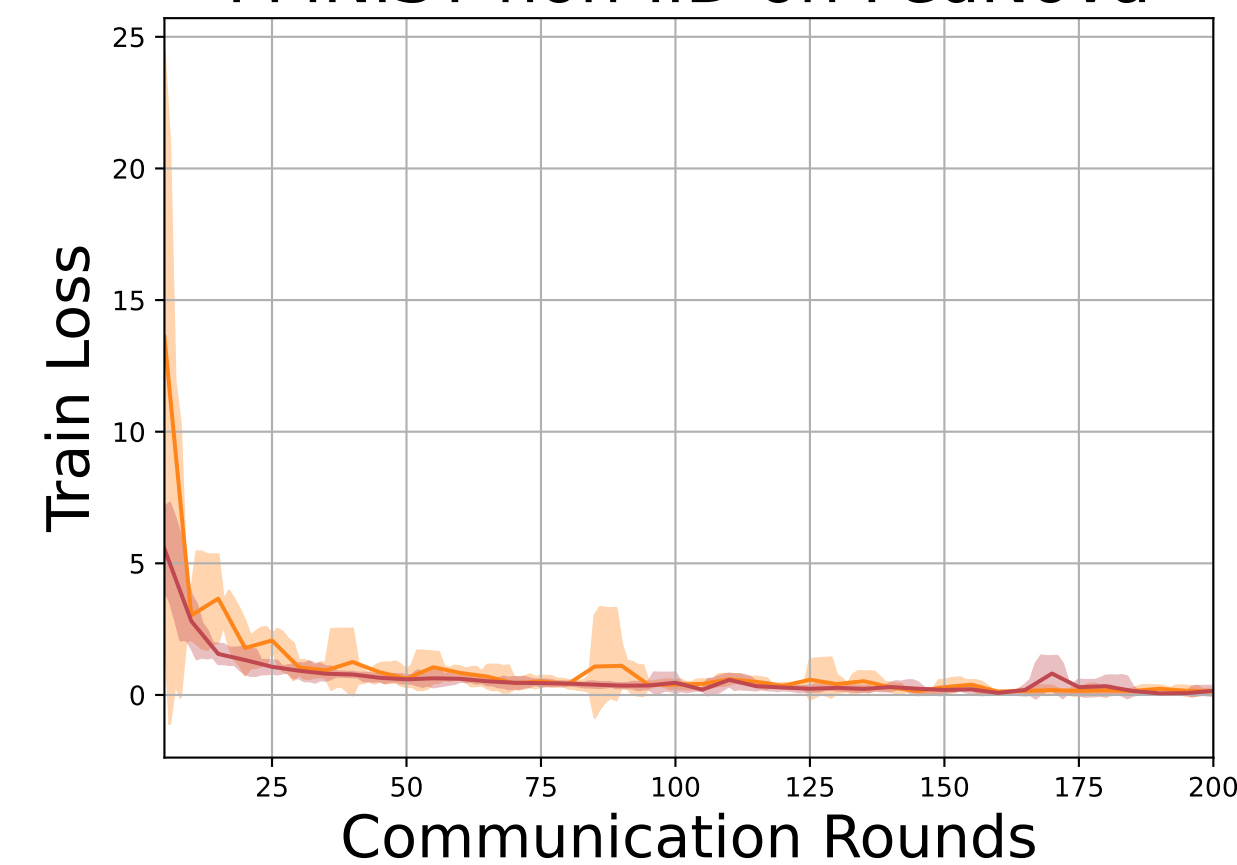

CIFAR10  $\alpha=0.001$  on FedNova

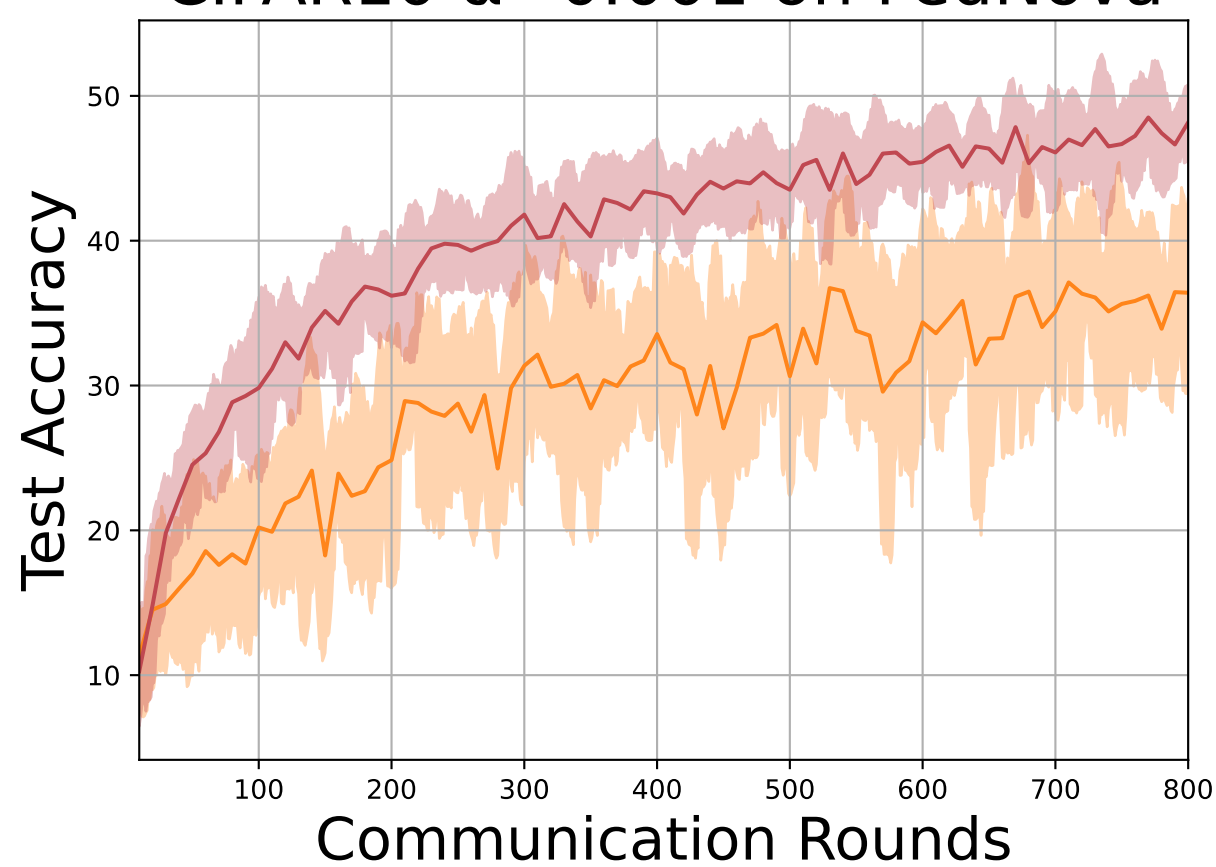

CIFAR10  $\alpha=0.001$  on FedNova

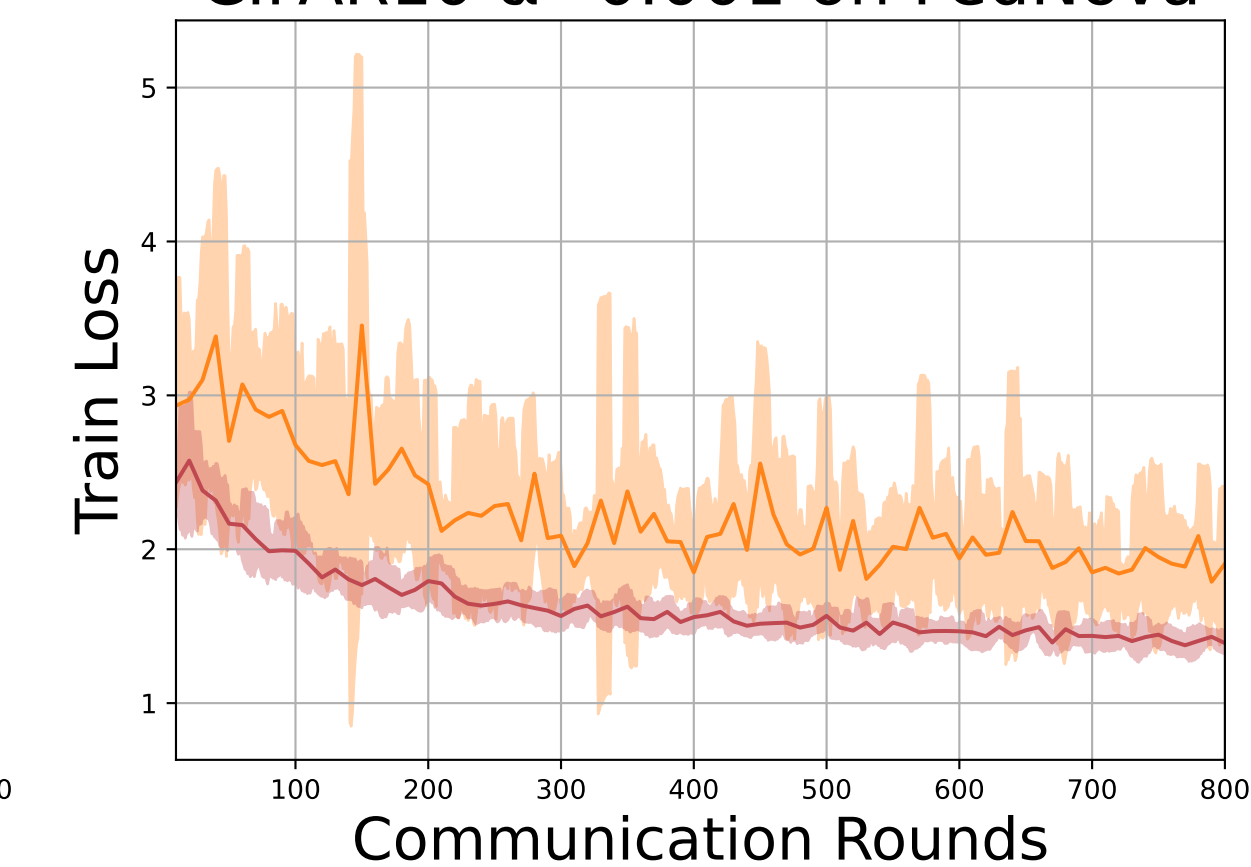

CIFAR10 Shard on FedNova

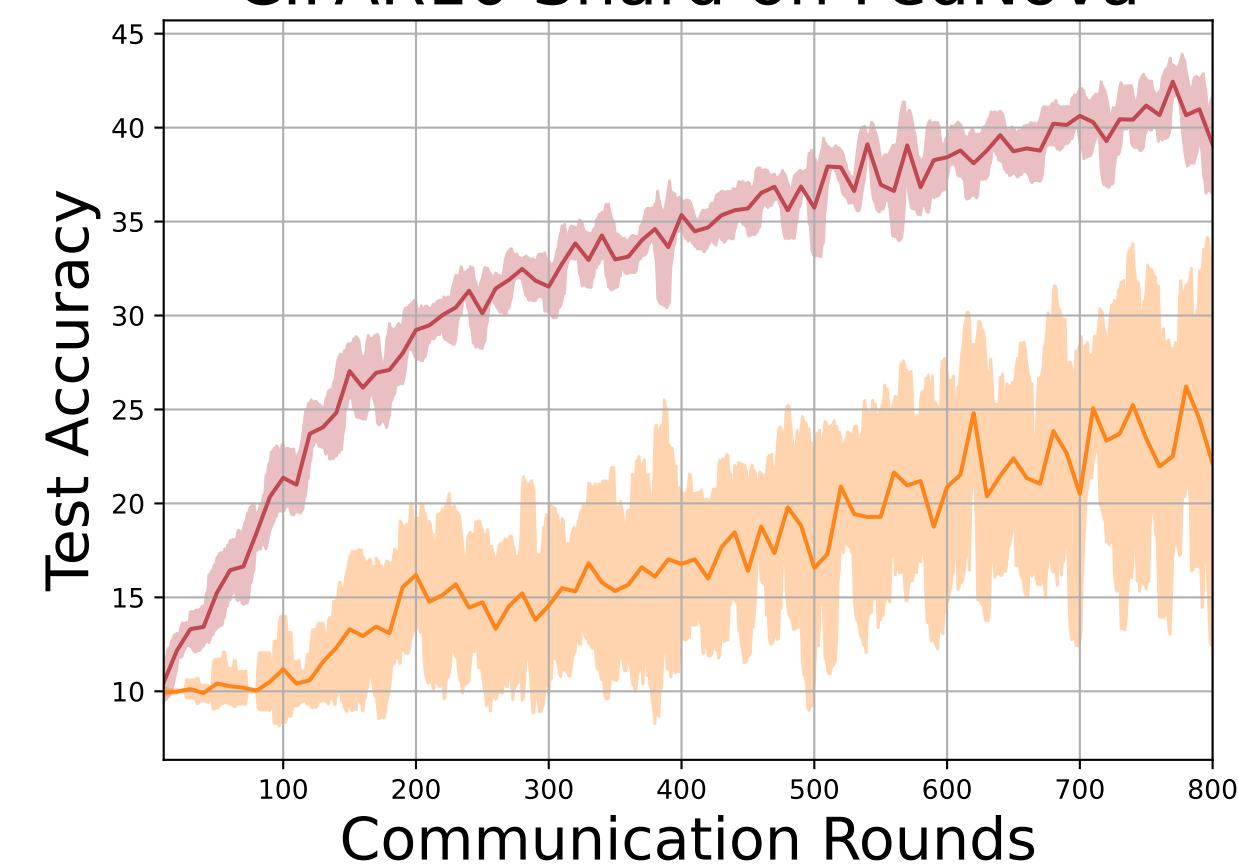

CIFAR10 Shard on FedNova

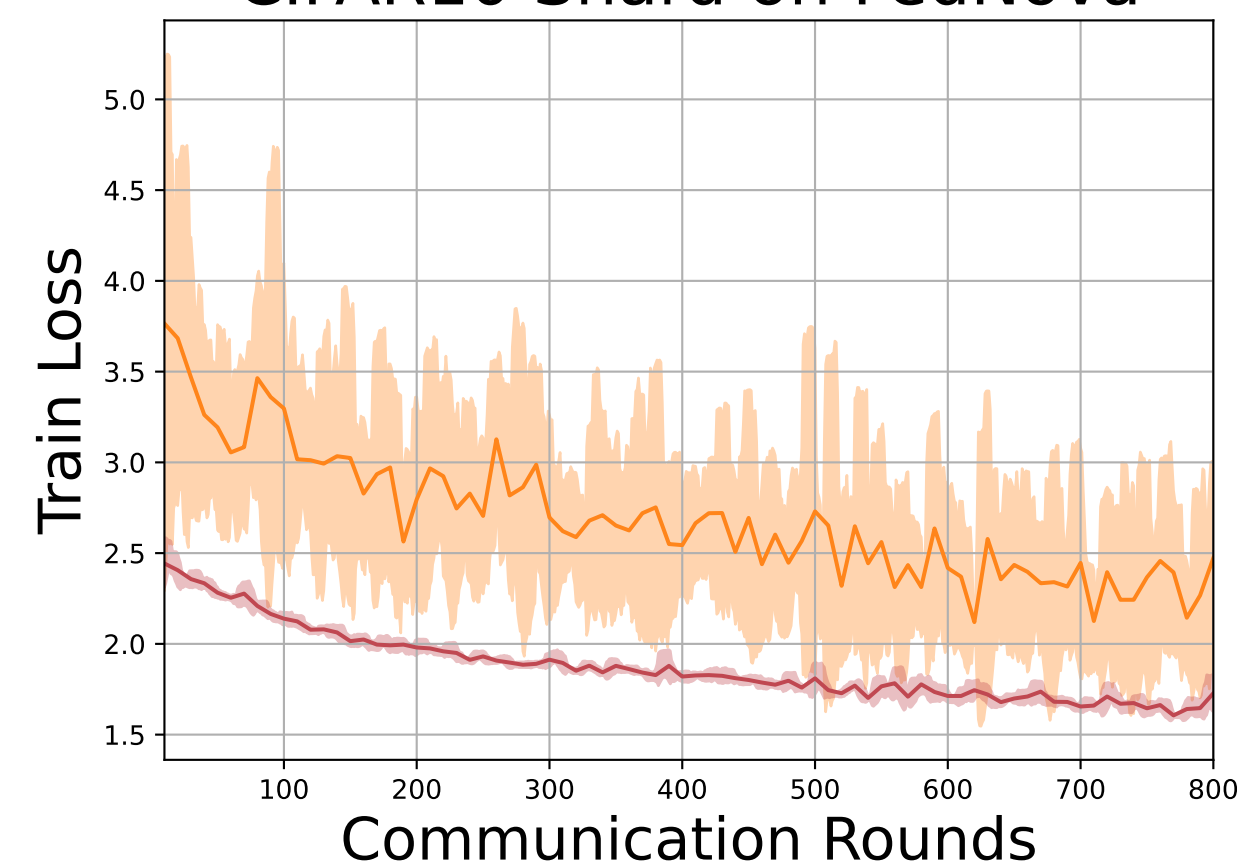

Supplement: supplementary_material [file attachment]
