# Supplementary material
Source: ML conference proceedings conference paper supplement (https://openreview.net/forum?id=JtSlA972EHP)
Supplement: supplementary_material [file attachment]

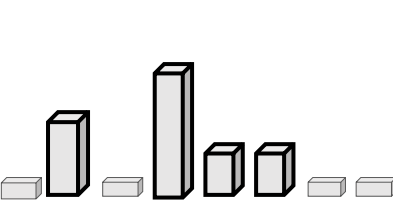

(a) Importance Sampling

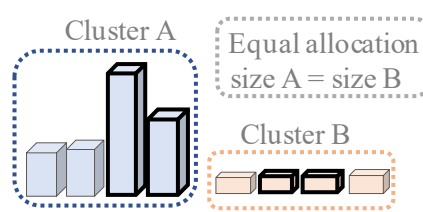

(b) Cluster Sampling

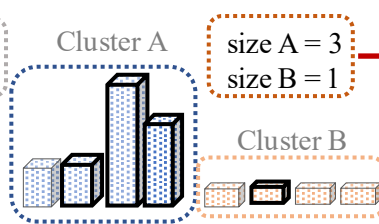

(c) HCSFed (Ours)

**Sample Size Reallocation**

 Selected Gradient

 Not Selected Gradient

 **Compressed Gradient**
