# Supplementary material
Source: ML conference proceedings conference paper supplement (https://openreview.net/forum?id=JtSlA972EHP)

FMNIST convex non-IID  $q=0.1$ 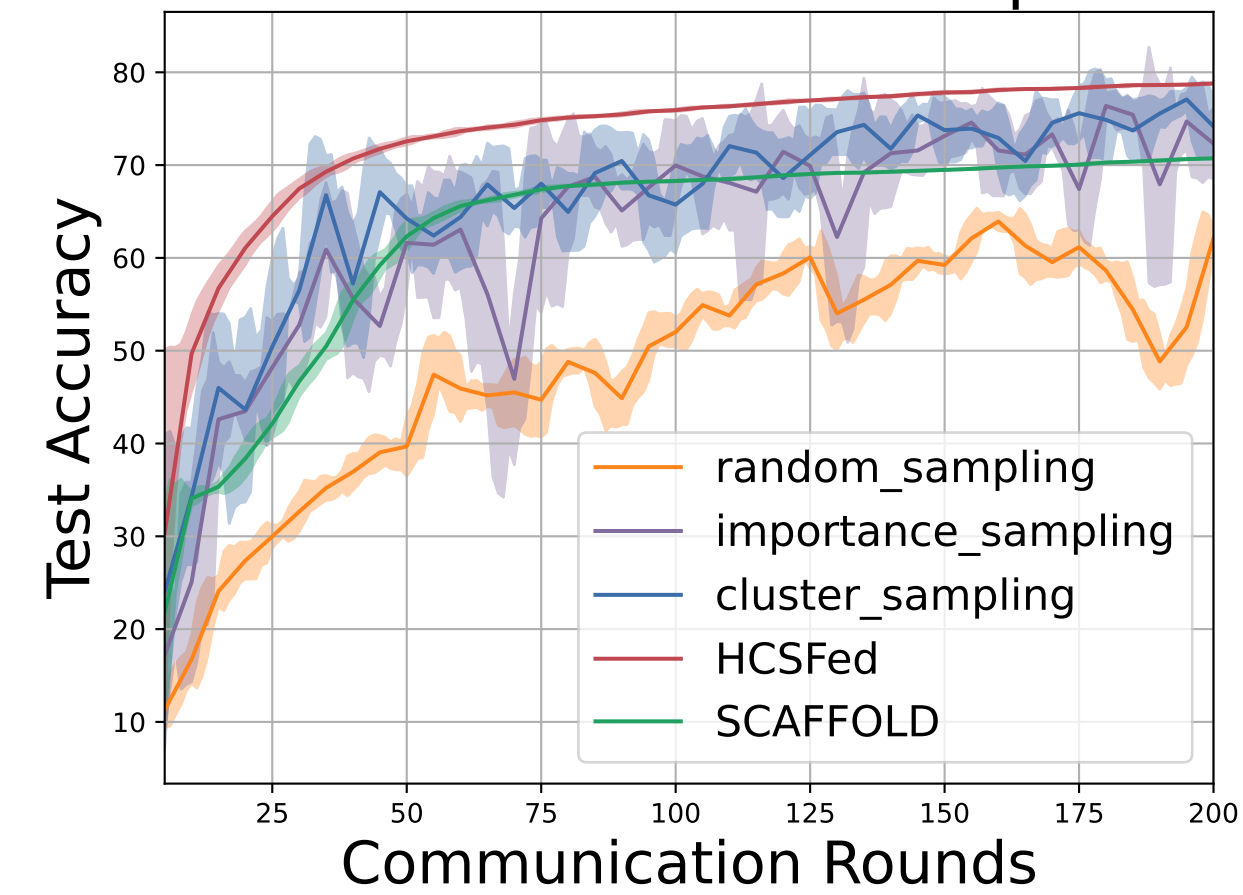FMNIST convex non-IID  $q=0.2$ 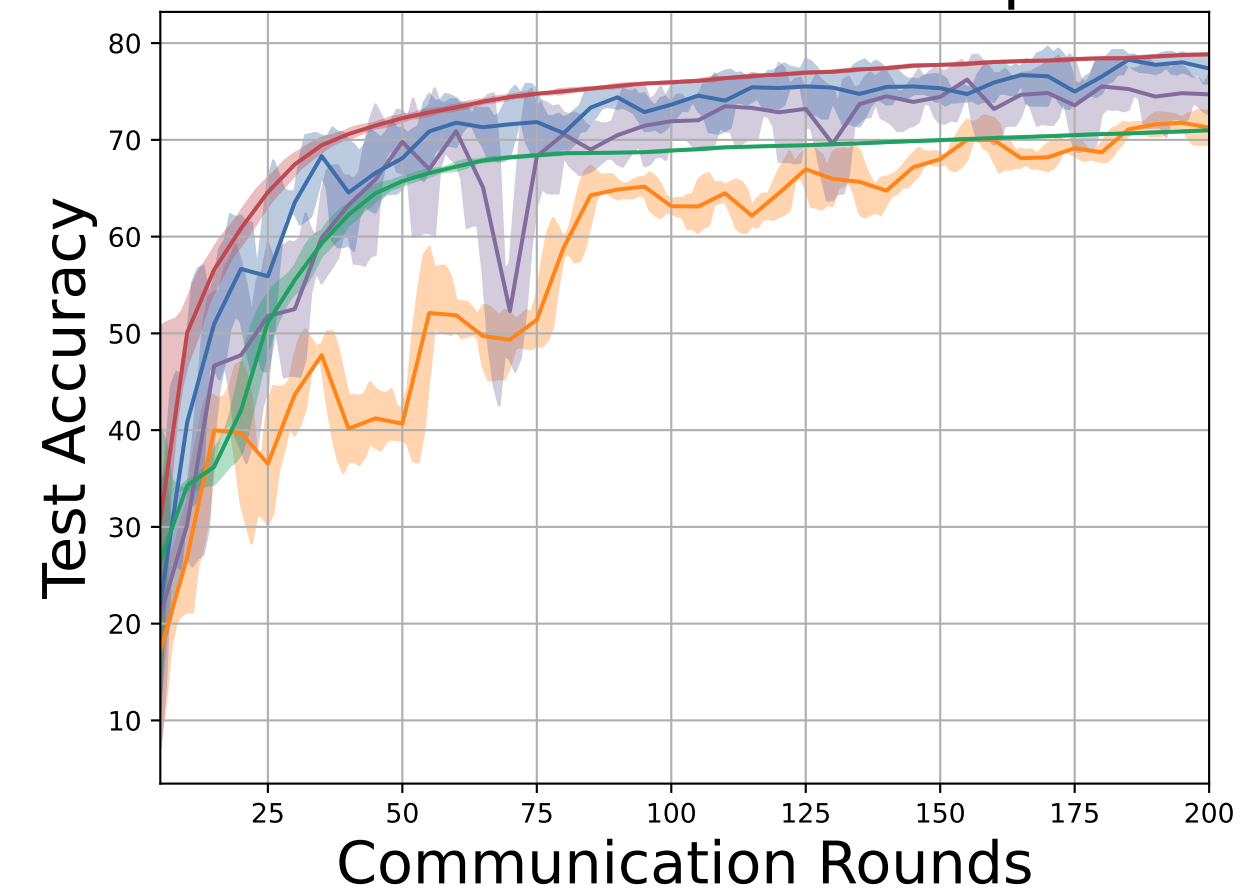FMNIST convex non-IID  $q=0.3$ 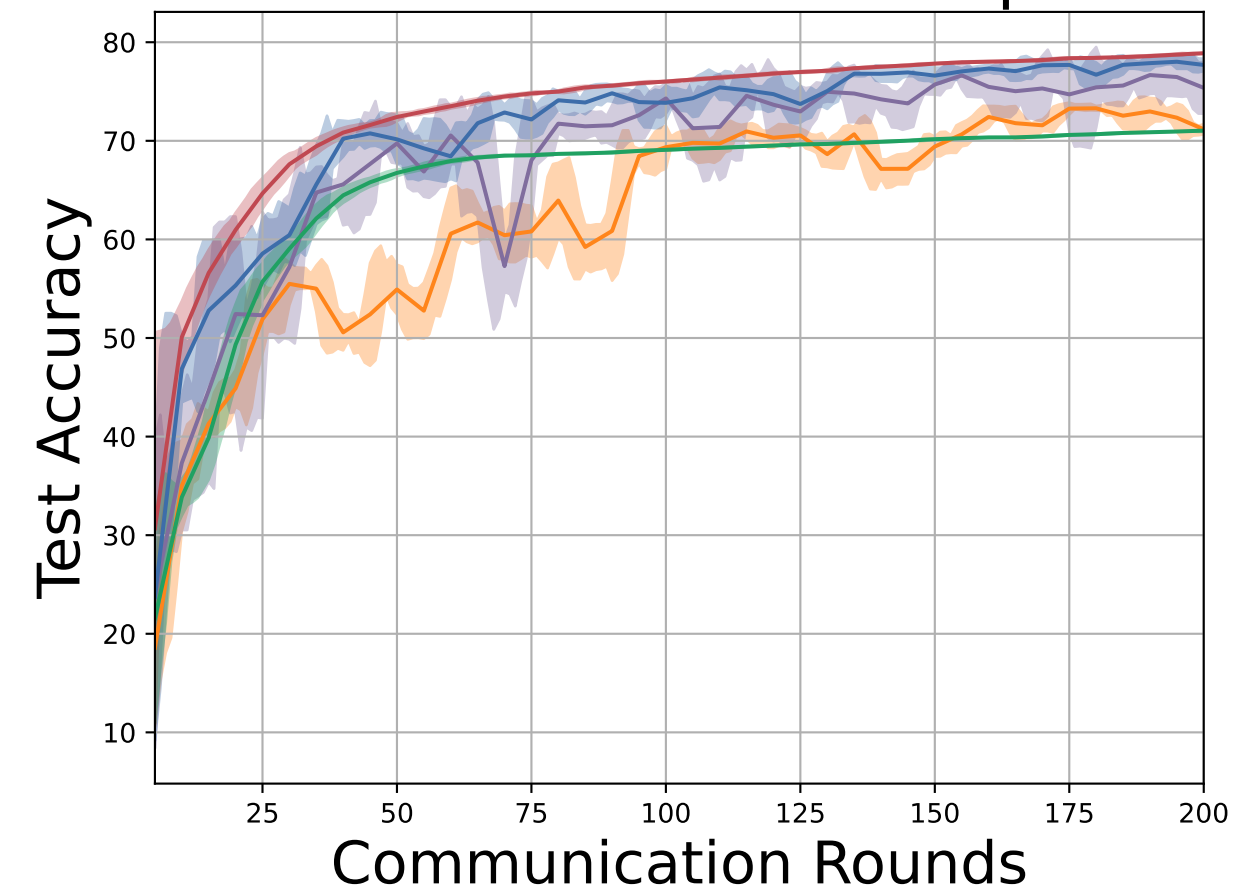FMNIST convex non-IID  $q=0.5$ 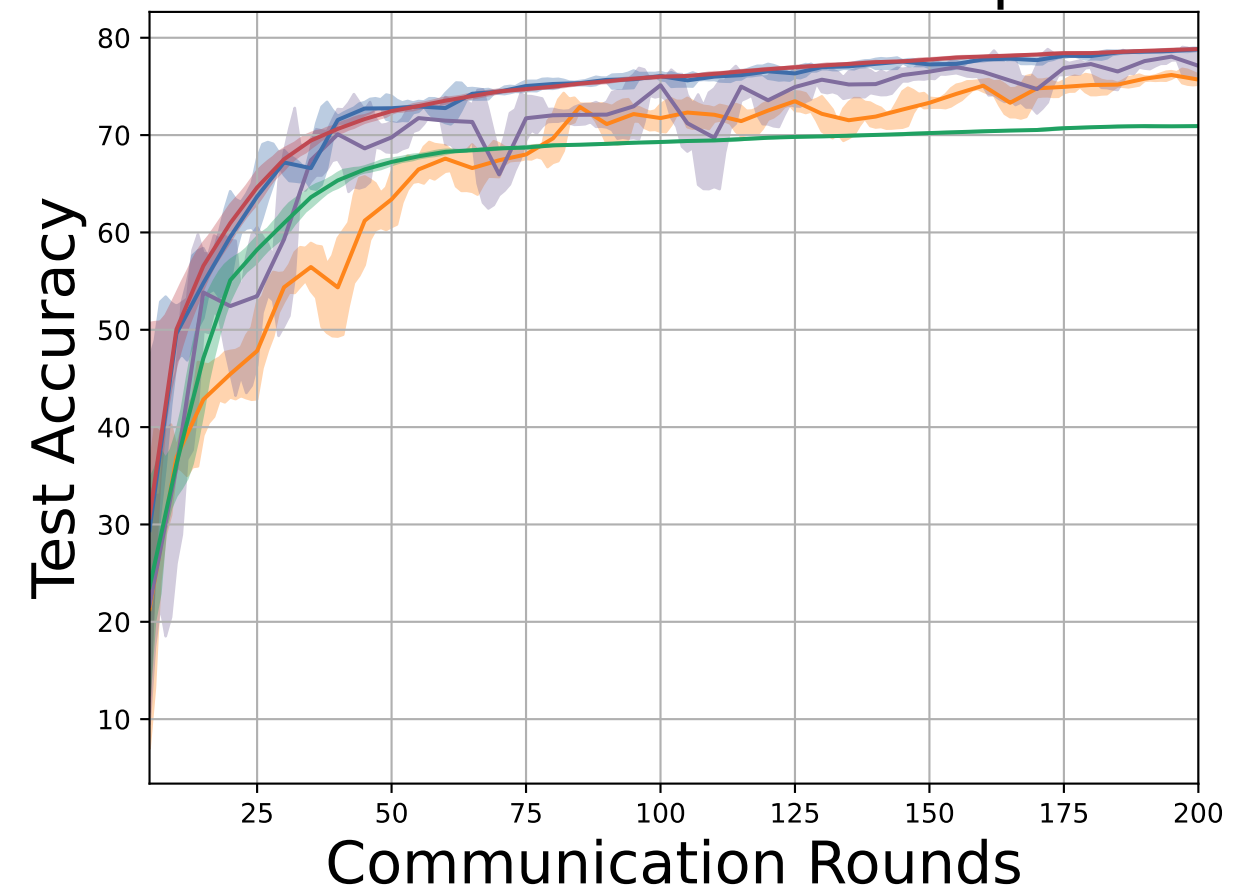FMNIST convex non-IID  $q=0.1$ 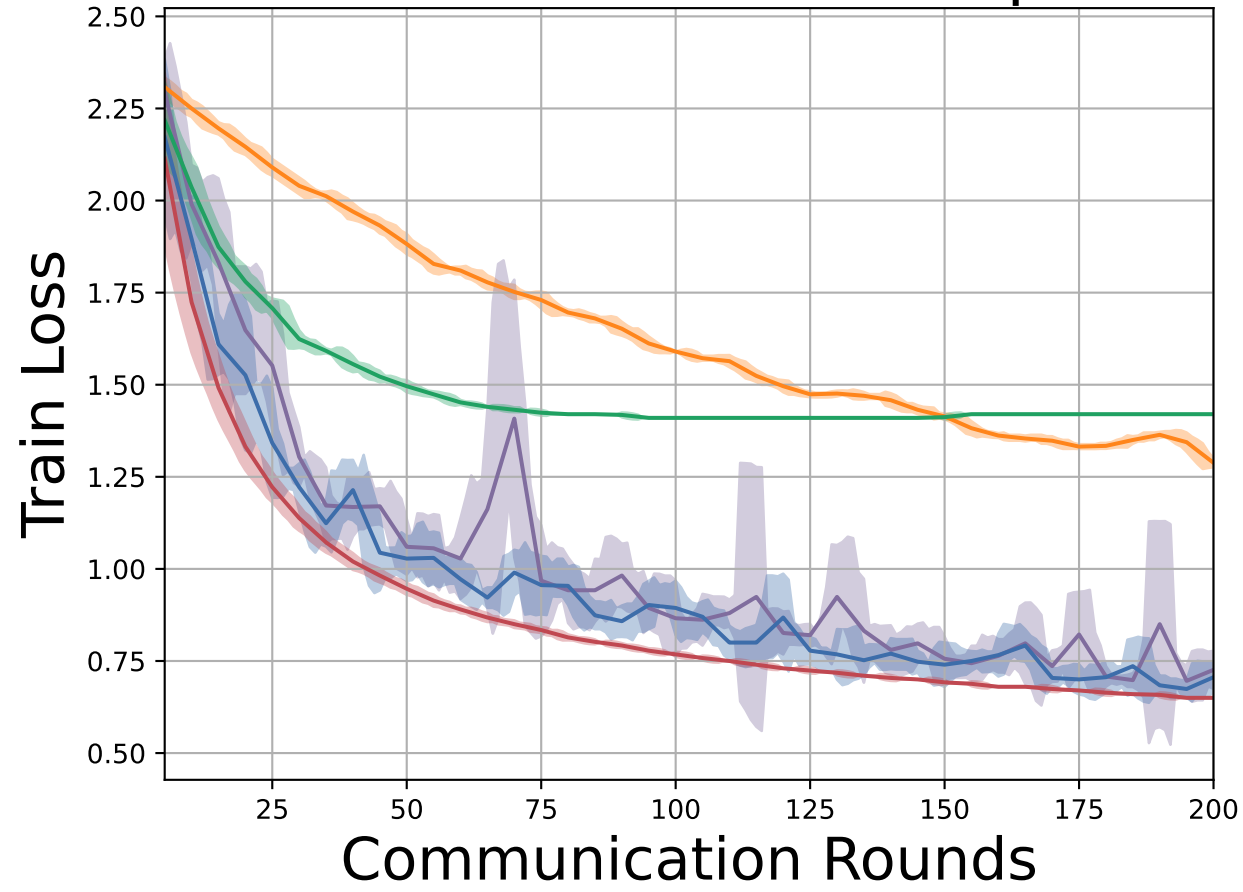FMNIST convex non-IID  $q=0.2$ 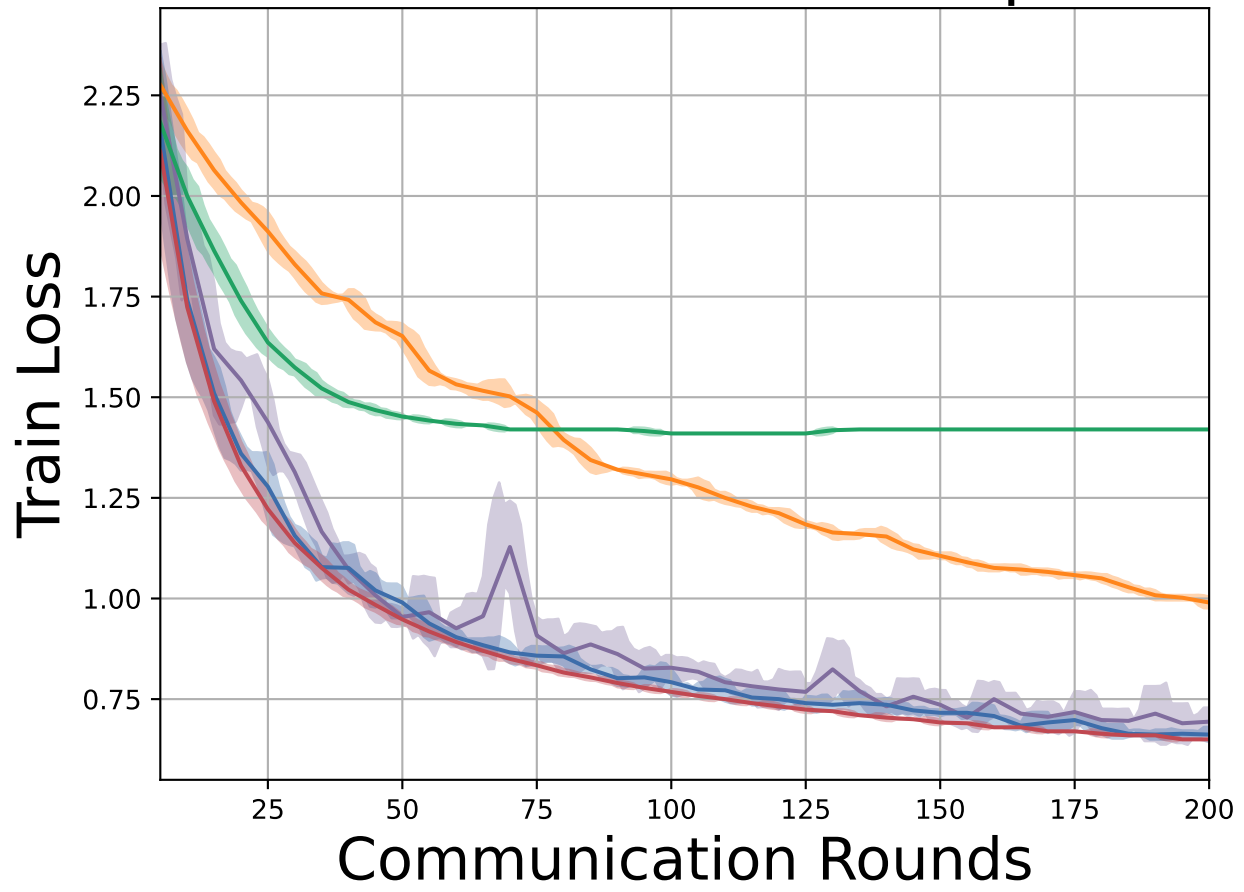FMNIST convex non-IID  $q=0.3$ 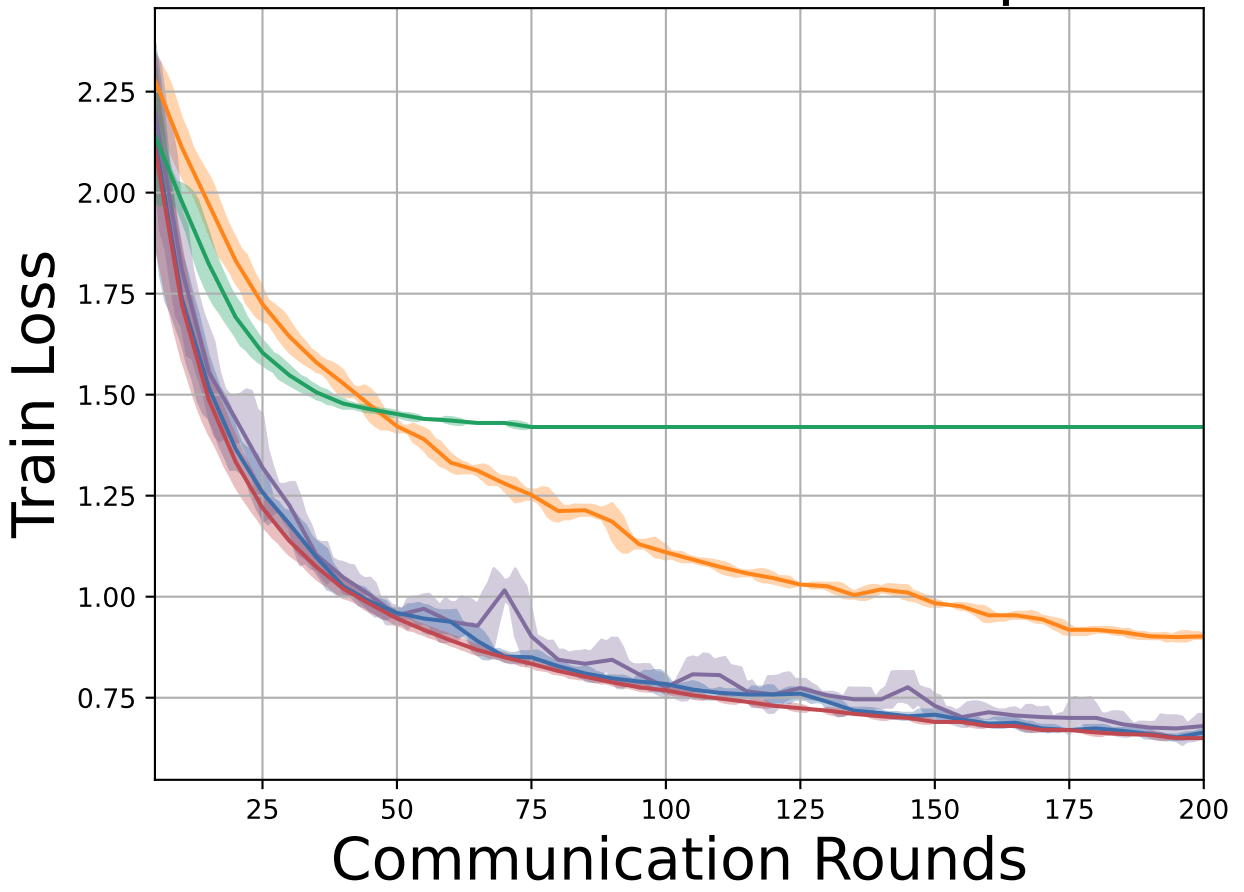FMNIST convex non-IID  $q=0.5$ 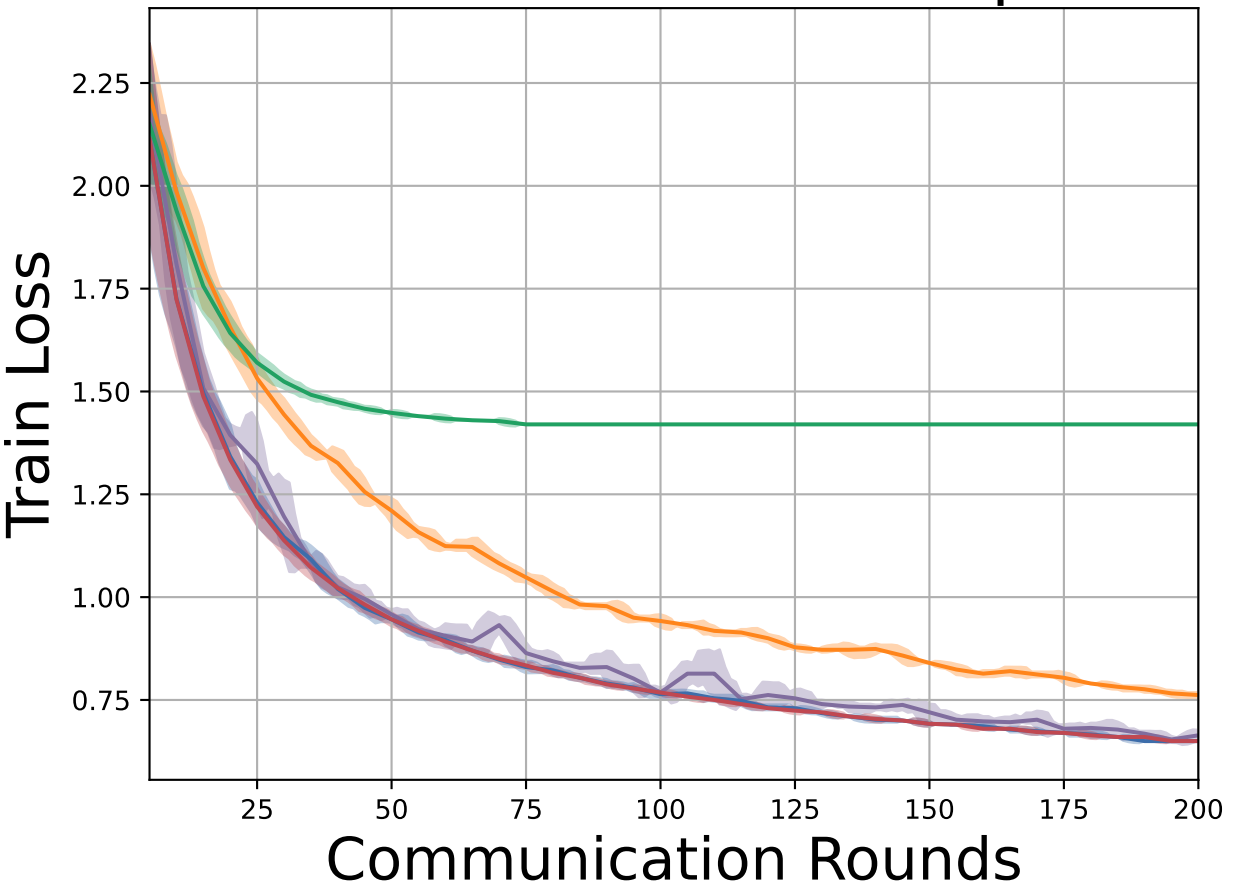

Supplement: supplementary_material [file attachment]
