# Supplementary material
Source: ML conference proceedings conference paper supplement (https://openreview.net/forum?id=JtSlA972EHP)

Rounds

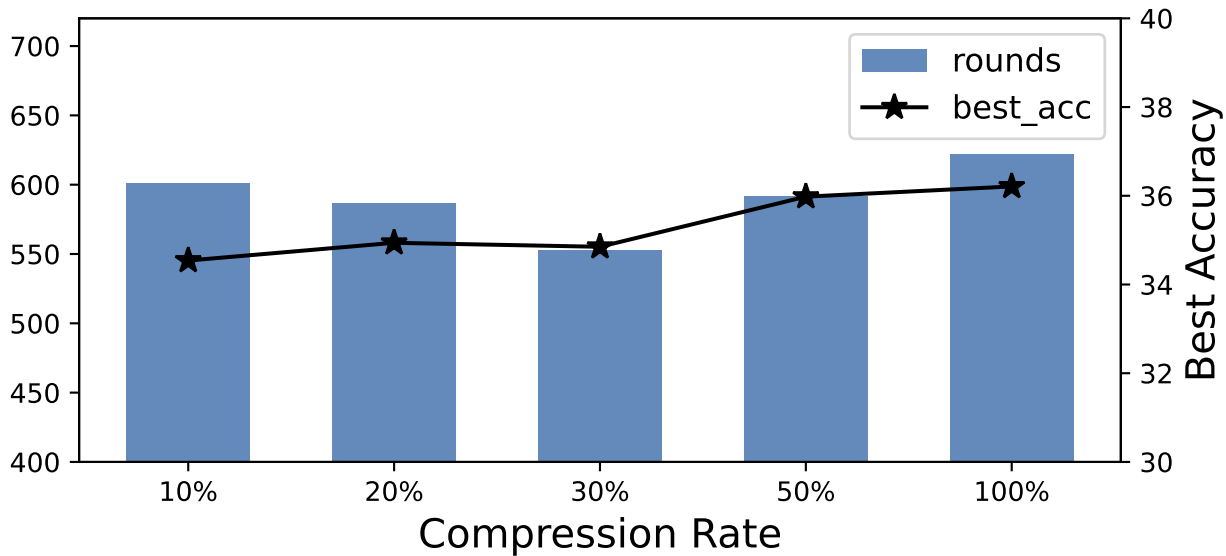

Supplement: supplementary_material [file attachment]

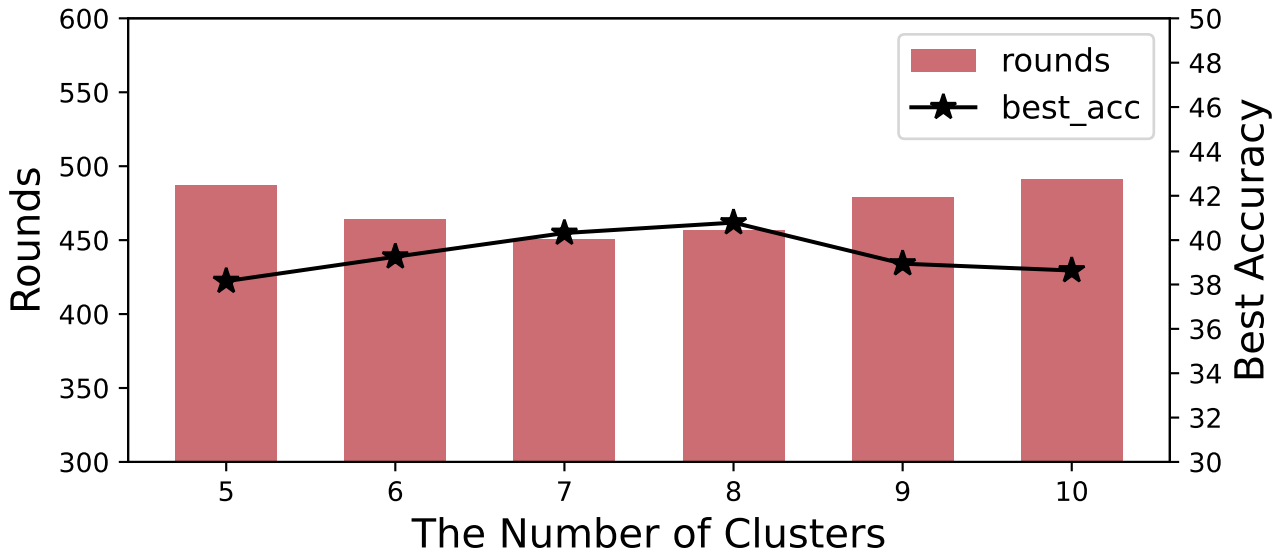

Supplement: supplementary_material [file attachment]

# CIFAR-10 non-convex $\alpha=0.01$

random scaffold importance cluster IFCA ours

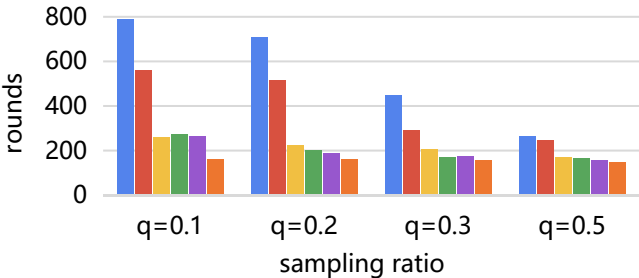

Supplement: supplementary_material [file attachment]

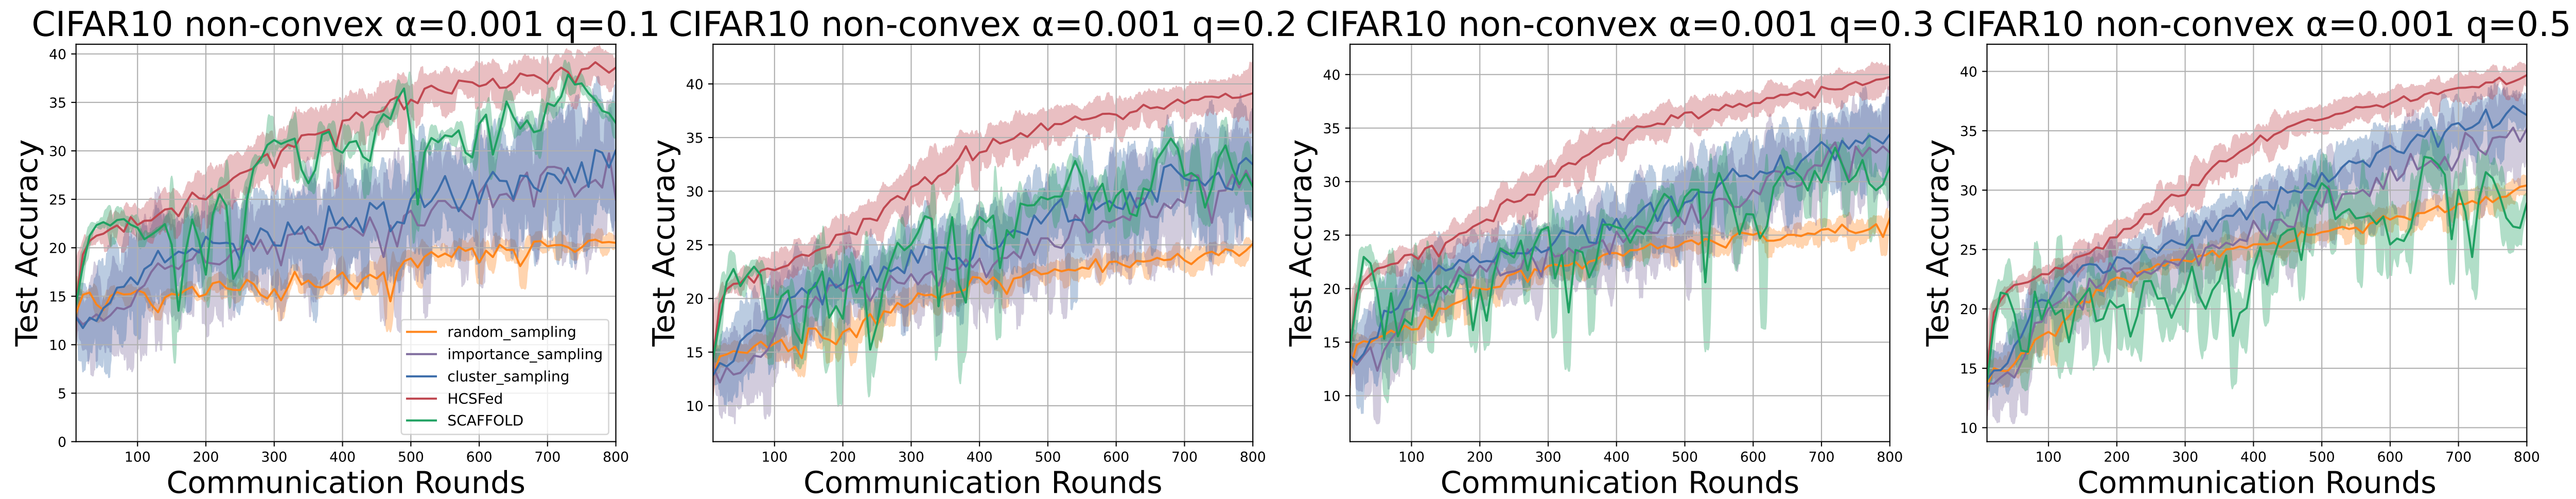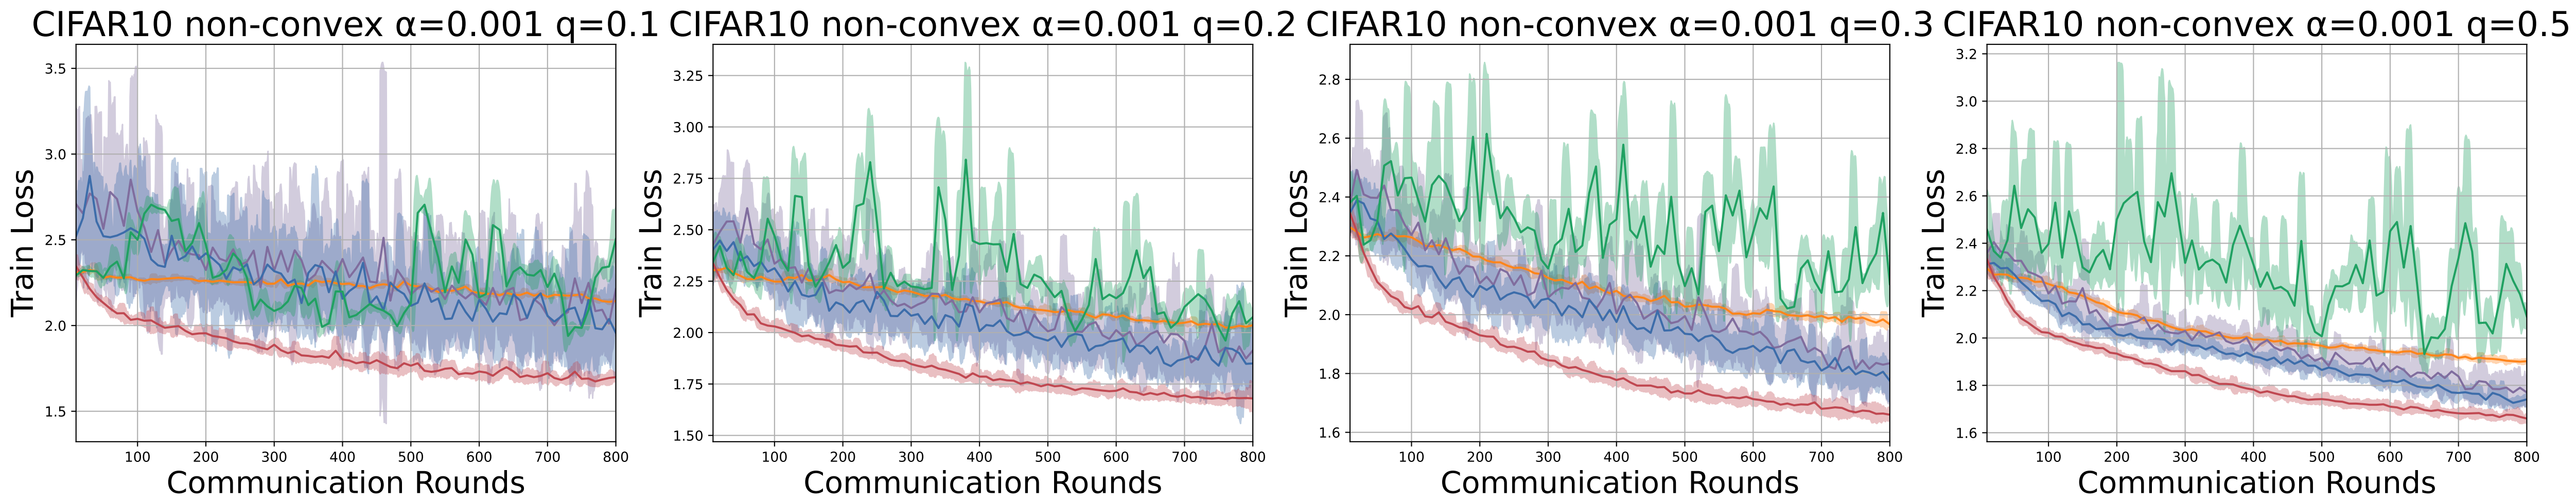

Supplement: supplementary_material [file attachment]

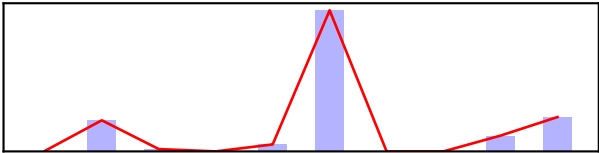

Supplement: supplementary_material [file attachment]

# FMNIST non-convex IID

random scaffold importance cluster IFCA ours

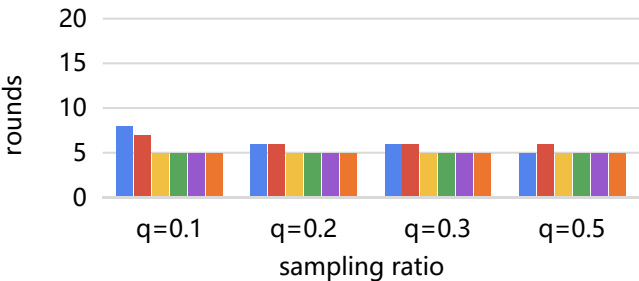

Supplement: supplementary_material [file attachment]

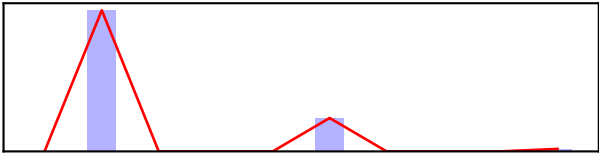

Supplement: supplementary_material [file attachment]

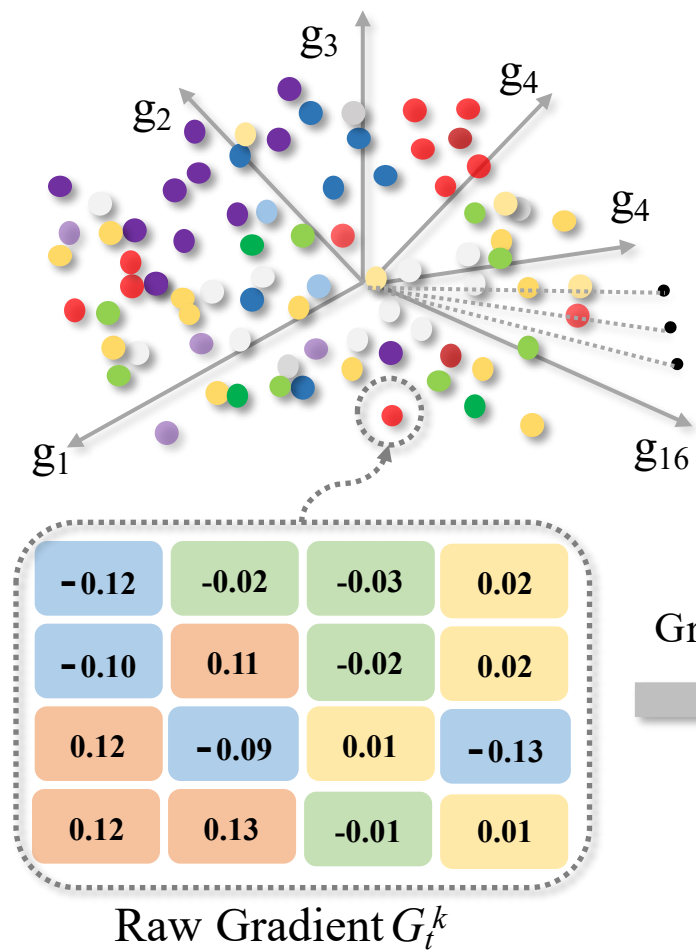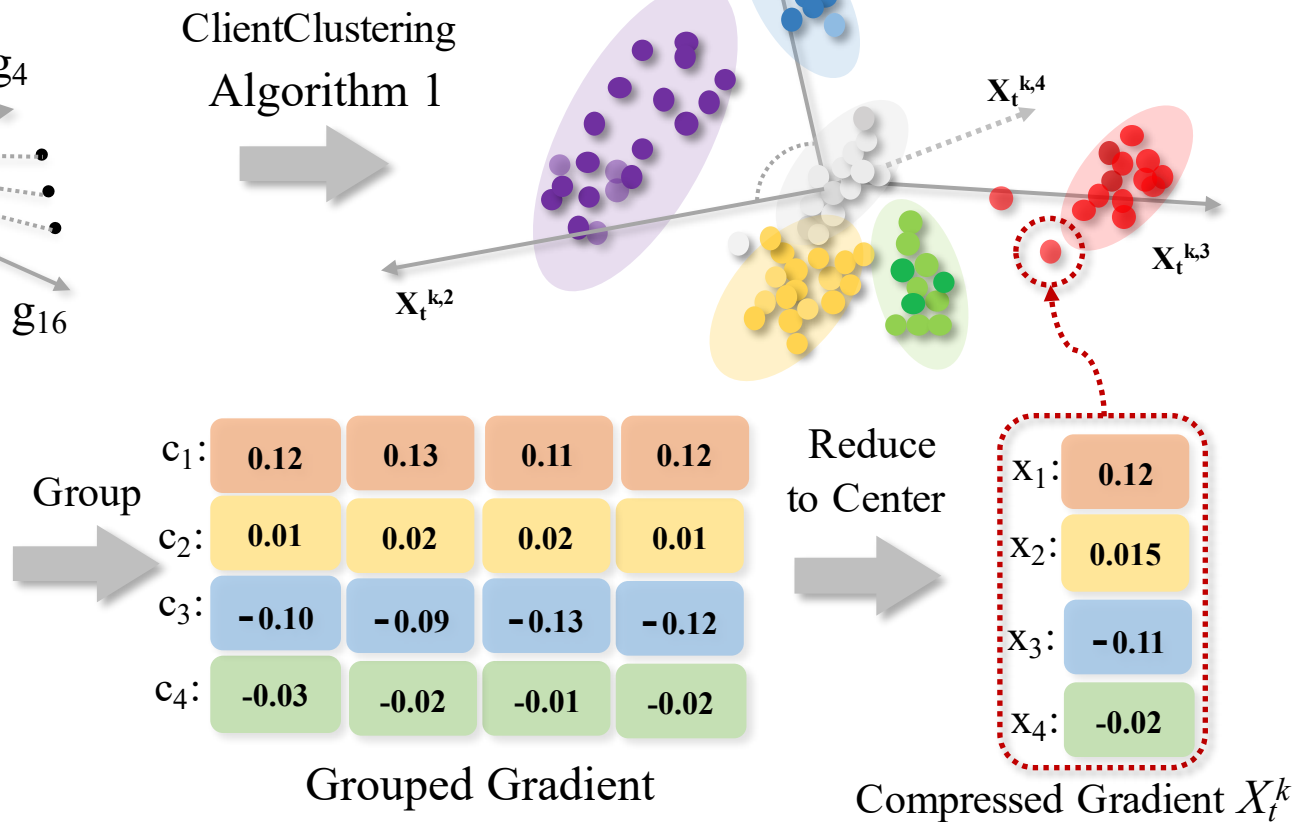

Supplement: supplementary_material [file attachment]

# MNIST non-convex IID

■ random ■ scaffold ■ importance ■ cluster ■ IFCA ■ ours

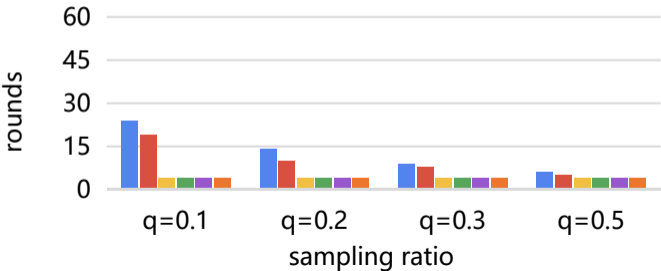

Supplement: supplementary_material [file attachment]

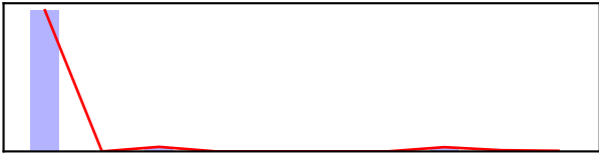

Supplement: supplementary_material [file attachment]

Rounds

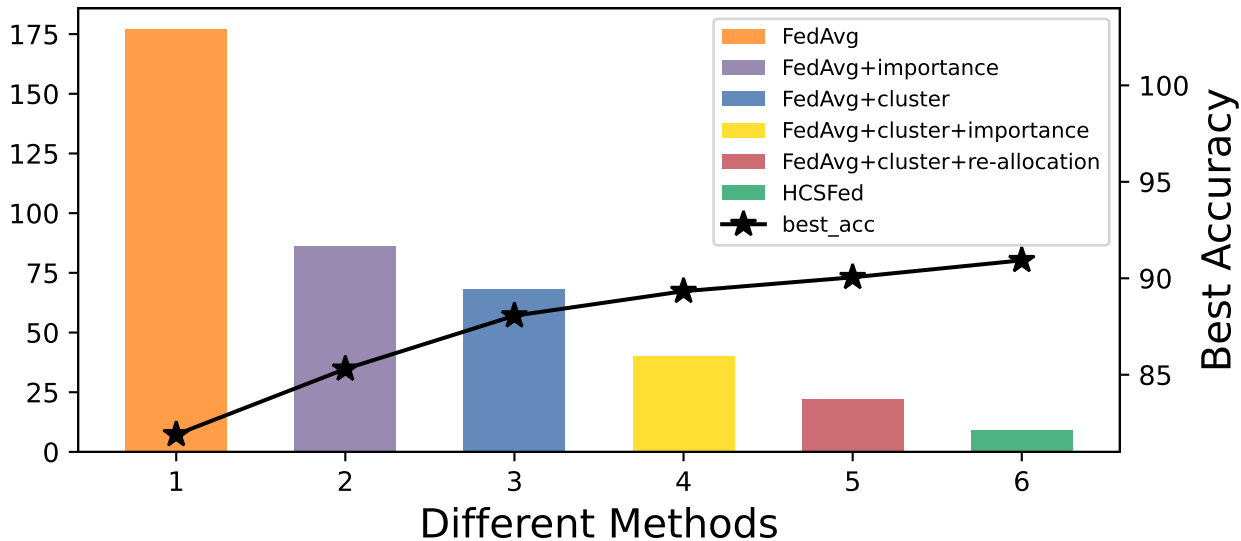

Supplement: supplementary_material [file attachment]

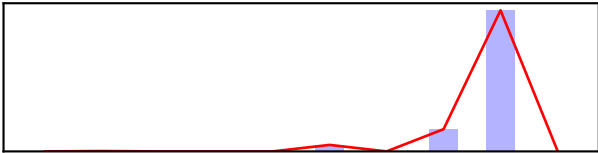

Supplement: supplementary_material [file attachment]

Rounds

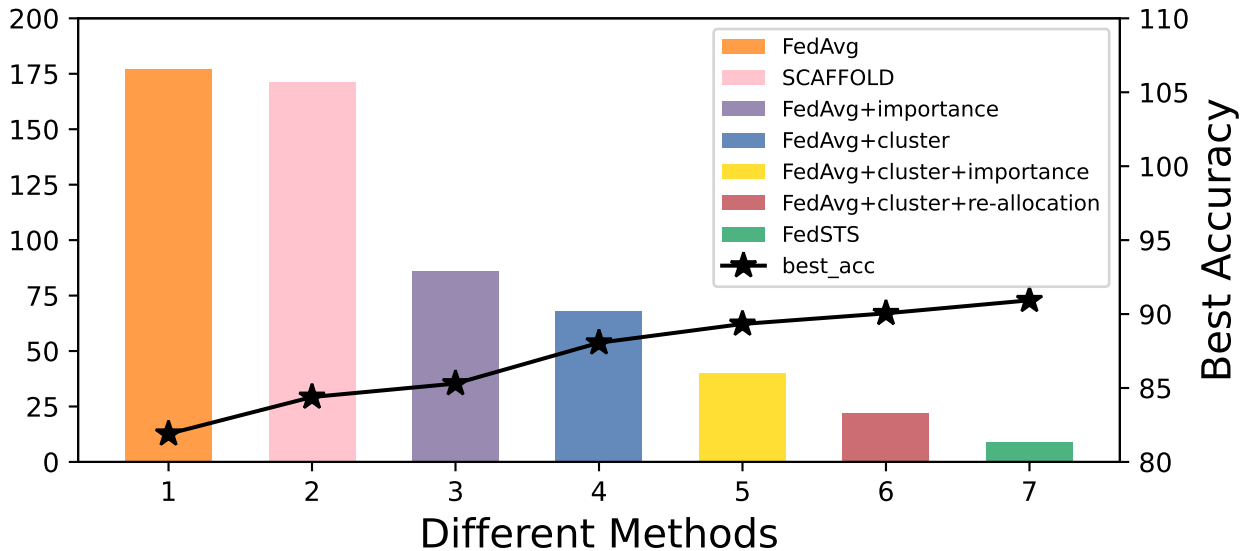

Supplement: supplementary_material [file attachment]

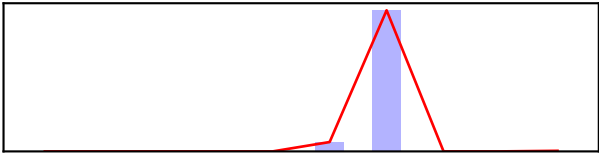

Supplement: supplementary_material [file attachment]

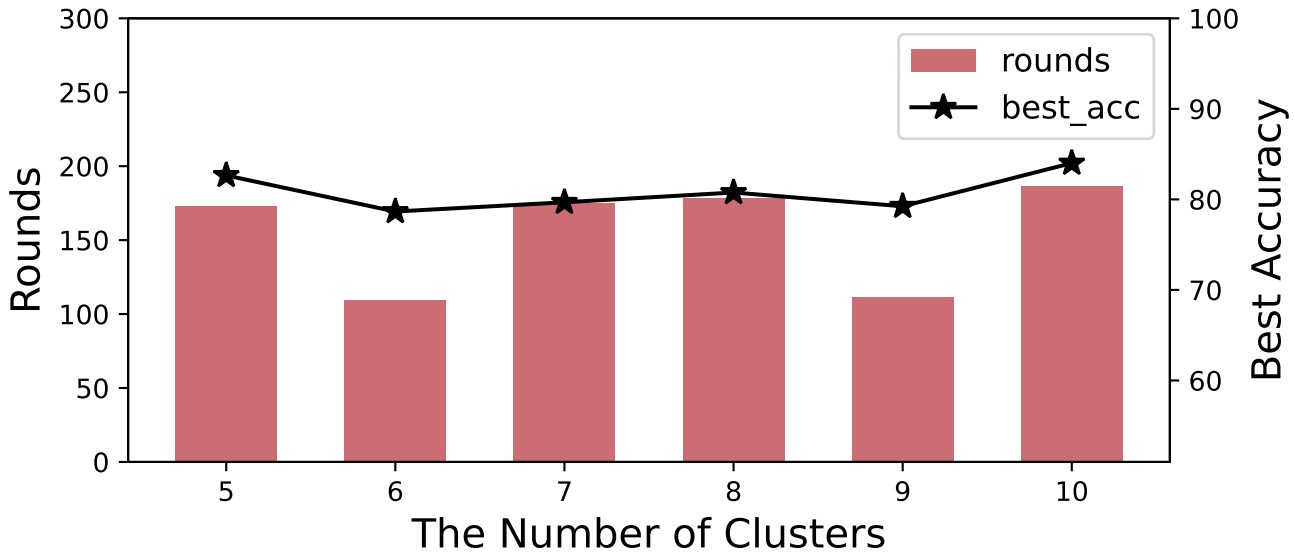

Supplement: supplementary_material [file attachment]

# FMNIST non-convex Non-IID

random scaffold importance cluster IFCA ours

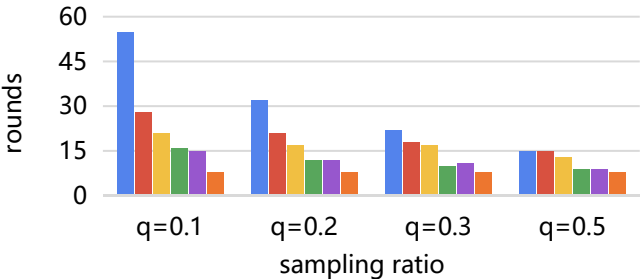

Supplement: supplementary_material [file attachment]

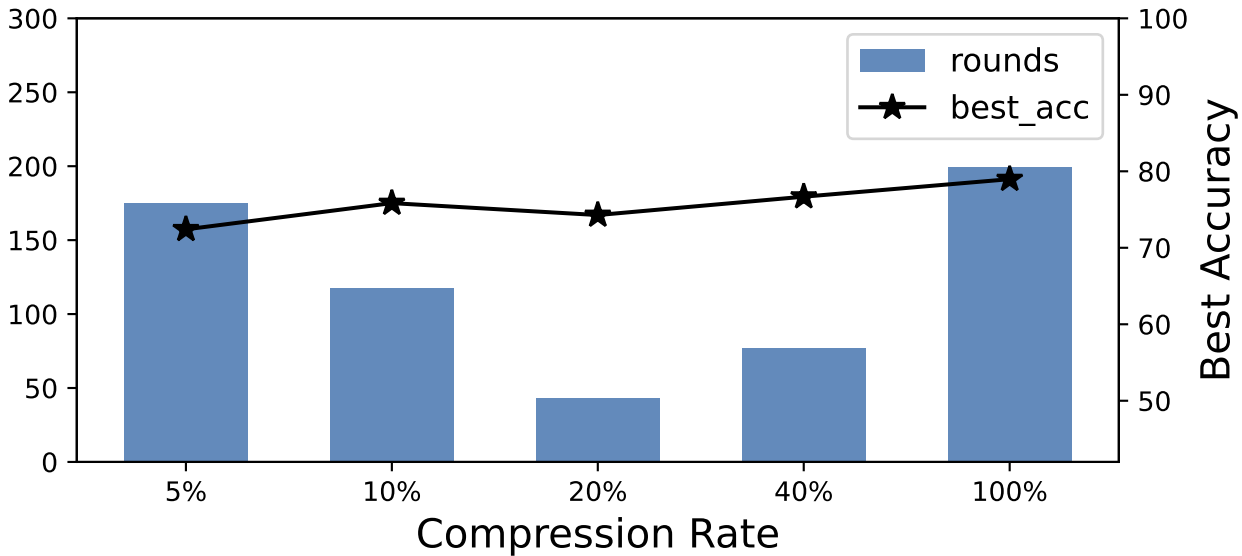

Supplement: supplementary_material [file attachment]

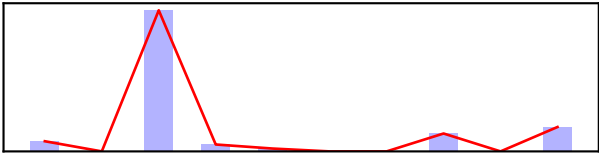

Supplement: supplementary_material [file attachment]

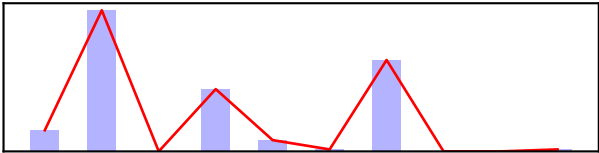

Supplement: supplementary_material [file attachment]

# CIFAR-10 non-convex $\alpha=0.001$

random scaffold importance cluster IFCA ours

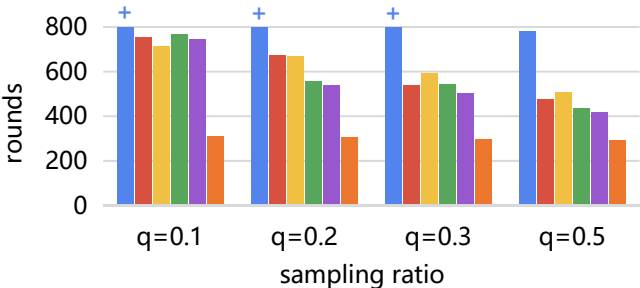

Supplement: supplementary_material [file attachment]

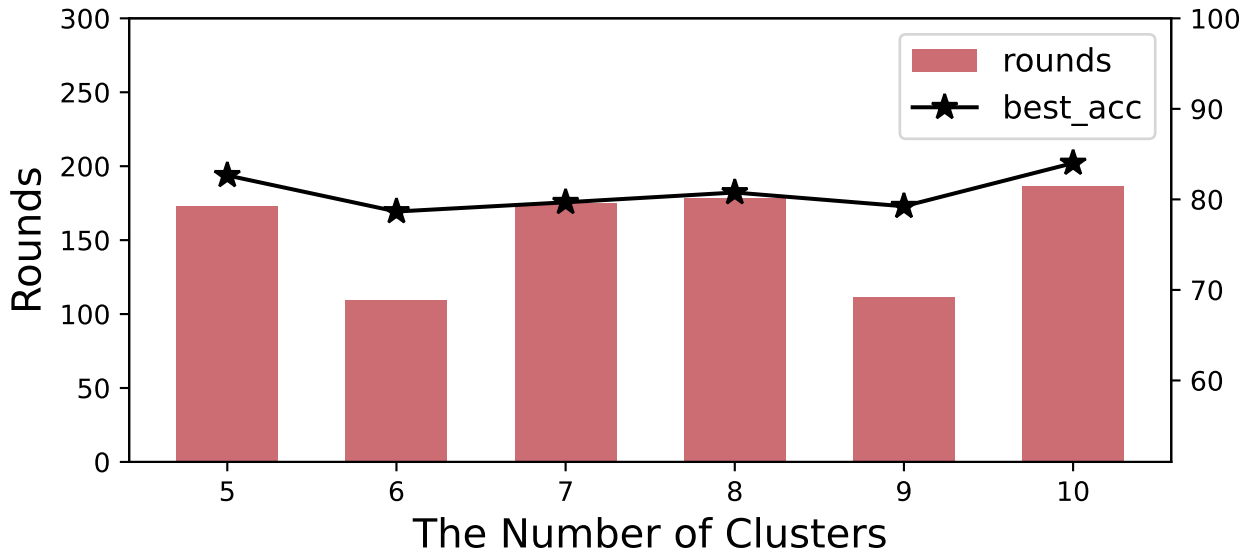

Supplement: supplementary_material [file attachment]

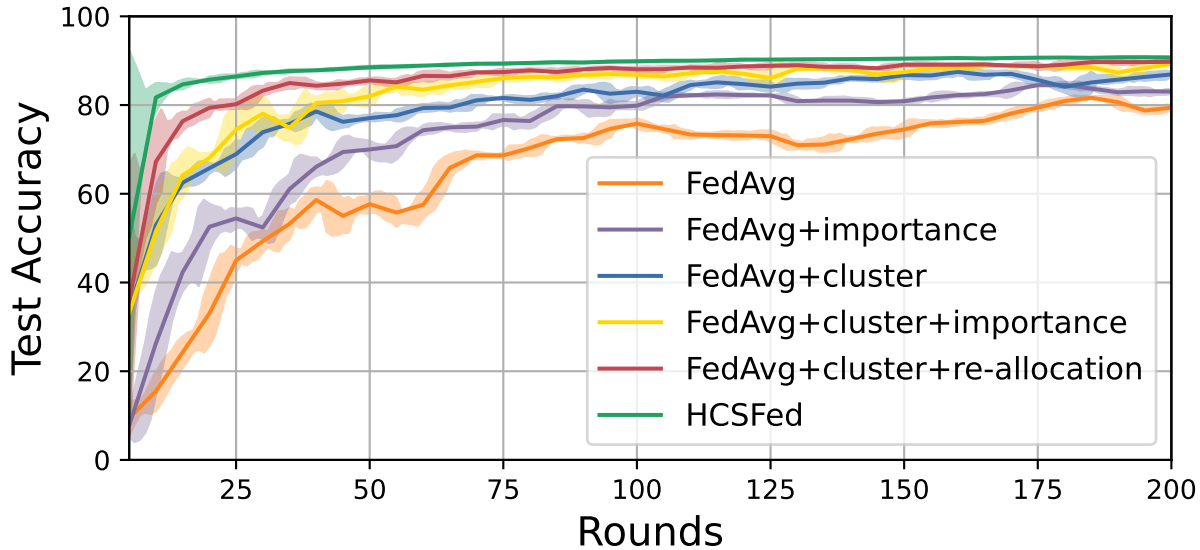

Supplement: supplementary_material [file attachment]

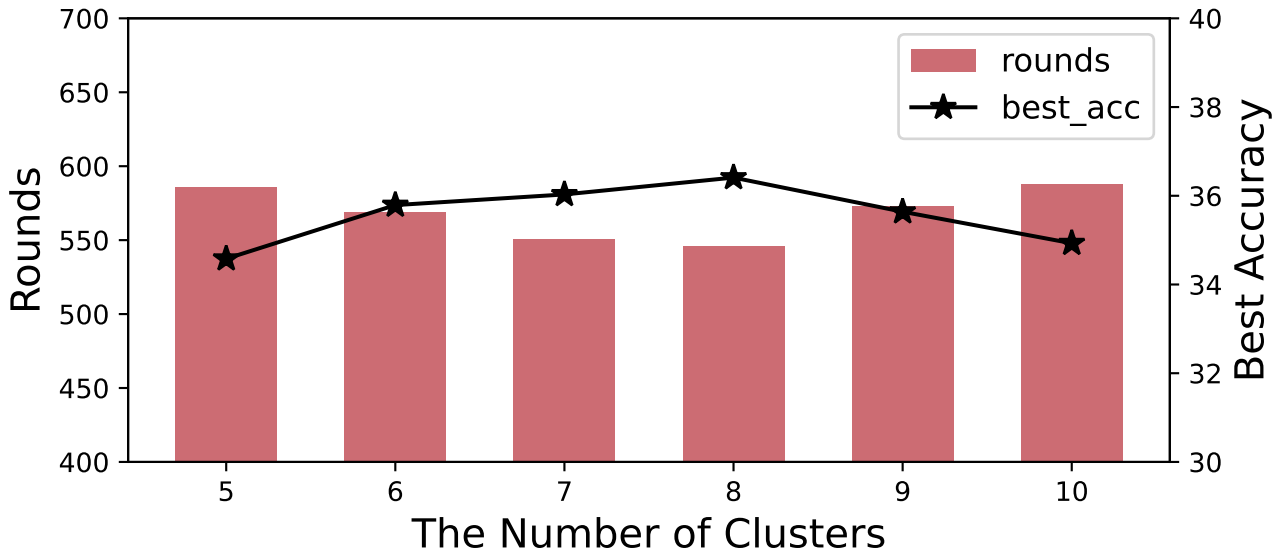

Supplement: supplementary_material [file attachment]

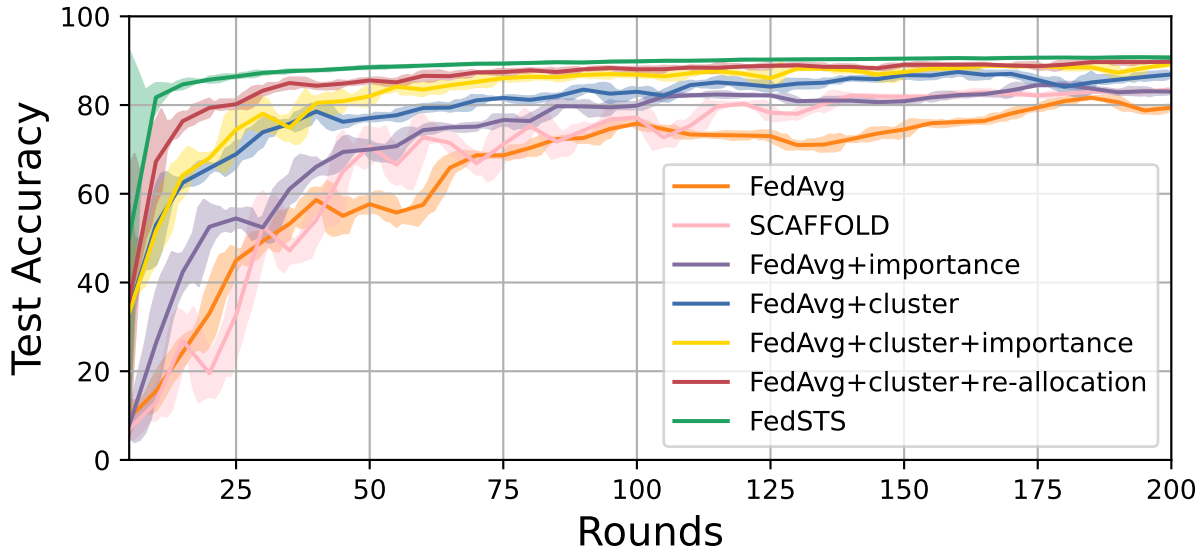

Supplement: supplementary_material [file attachment]

Rounds

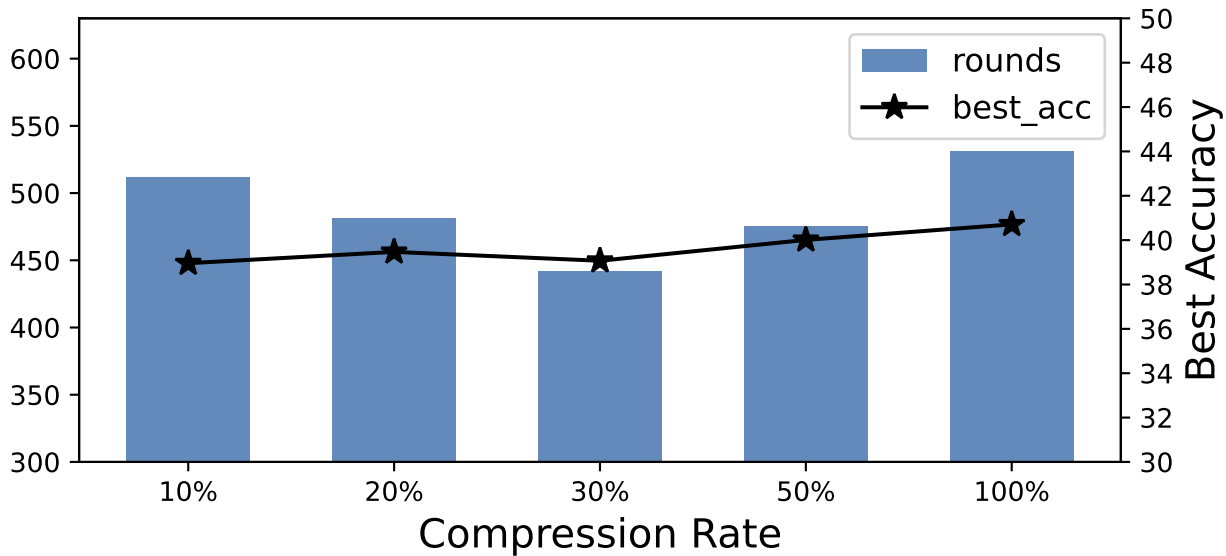

Supplement: supplementary_material [file attachment]

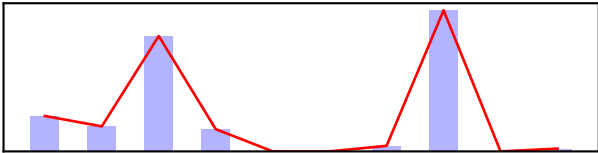

Supplement: supplementary_material [file attachment]

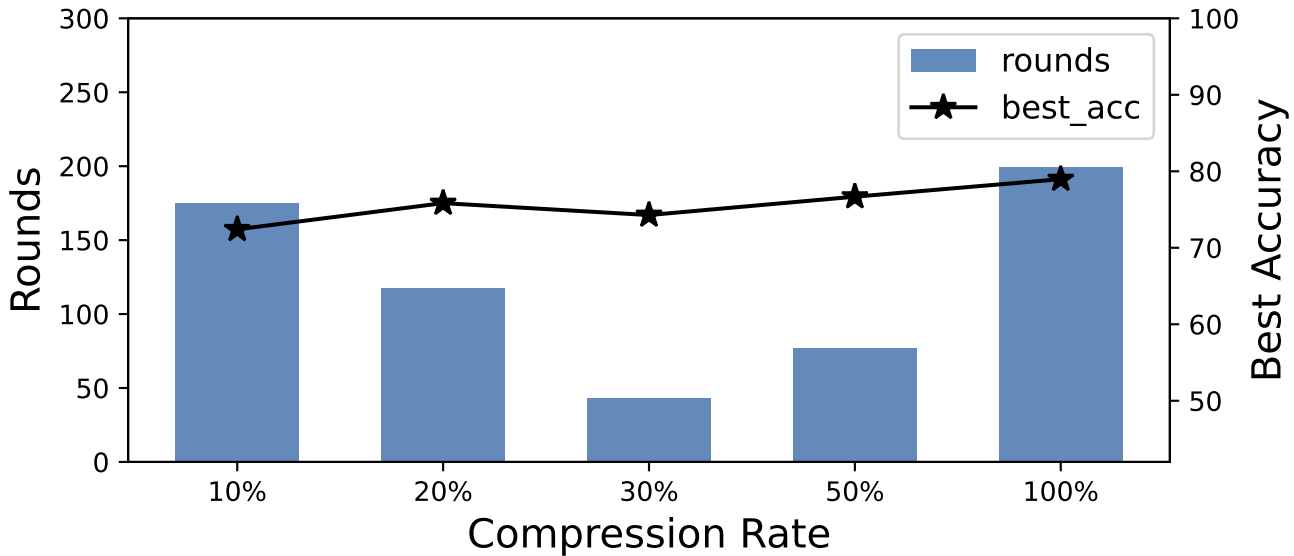

Supplement: supplementary_material [file attachment]

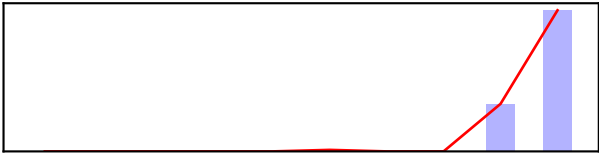

Supplement: supplementary_material [file attachment]

# MNIST non-convex non-IID

random scaffold importance cluster IFCA ours

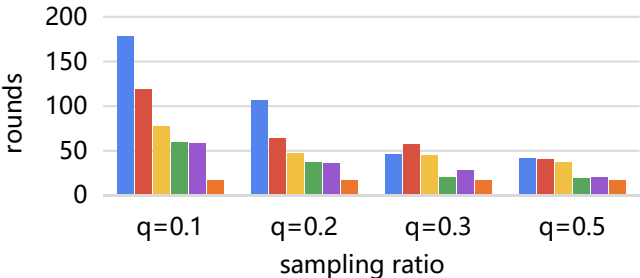

Supplement: supplementary_material [file attachment]

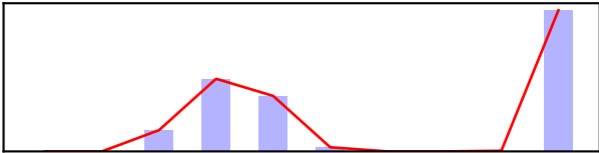

Supplement: supplementary_material [file attachment]
